# Supplementary material for: Oxidative Stress and Autophagy Are Important Processes in Post Ripeness and Brown Film Formation in Mycelium of Lentinula edodes
Source: Front Microbiol. 2022 Feb 24;13:811673. doi: 10.3389/fmicb.2022.811673 (PMC8908433; doi:10.3389/fmicb.2022.811673)
Supplement: Supplementary file 8 [file Table_7.XLS]

## Sheet: Table S10
Table S7. Accession numbers of the four DEPs and their gene primers used for qRT-PCR.
Accession	Gene acronym	Forward Primers (5'-3')	Reverse Primers (5'-3')
LE01Gene09525.t1	RPD3	TGCTTCGCCCTTTATCACAG	AACCCGTTCCTCGTTACCTC
LE01Gene03985.t1	TOR1	AGCATTTCTAACACCTATTGGACC	TGGCAAGTAAAGCCTAGACAGC
LE01Gene05485.t1	VAC8	CGTTTATCGTCTTCTAACCCTCG	AAATTCGTCCAACCTTTCATCAG
LE01Gene10225.t1	VMA3	CGTTCAAGTGCCTCATCCG	GCACCATTCCAACAAACAACC
