# Supplementary material for: Oxidative Stress and Autophagy Are Important Processes in Post Ripeness and Brown Film Formation in Mycelium of Lentinula edodes
Source: Front Microbiol. 2022 Feb 24;13:811673. doi: 10.3389/fmicb.2022.811673 (PMC8908433; doi:10.3389/fmicb.2022.811673)
Supplement: Supplementary file 10 [file Table_9.XLS]

## Sheet: Sheet1
Table S9 The H2O2 level （mmol/gprot） during BF formation stage
	30D	45D	60D	75D
	0.0422	0.0031	0.5864	0.1075
	0.0062	0.1267	0.0432	0.06
	0.0199	0.2851	0.1224	0.0298
Mean	0.0227667	0.1383	0.250667	0.0657667
