# Supplementary material for: Oxidative Stress and Autophagy Are Important Processes in Post Ripeness and Brown Film Formation in Mycelium of Lentinula edodes
Source: Frontiers journal article supplement (doi:10.3389/fmicb.2022.811673), 2022-02-24
Supplement: Table_2.XLS [file Table_2.XLS]

## Sheet: 2-1
Table S2A.The results of the DEPs when 2-1
N	Unused	Total	% Cov	Accession #	Name	Peptides(95%)	Species	115:113	116:113	115:114	116:114	2-1
1	129.12	129.12	95.1	LE01Gene04245.t1	LE01Gene04245.t1	497		2.3566	2.2814	2.6724	2.6006	2.47775
47	60.94	61.15	82.4	LE01Gene02536.t1	LE01Gene02536.t1	120		0.4031	0.4139	0.4836	0.5001	0.450175
98	47.95	59.51	80.2	LE01Gene05169.t1	LE01Gene05169.t1	177		2.7054	2.5849	2.8494	2.7368	2.71913
101	47.45	49.44	59.4	LE01Gene02678.t2	LE01Gene02678.t2	64		0.4412	0.453	0.453	0.4691	0.454075
108	46.14	46.16	81	LE01Gene12328.t1	LE01Gene12328.t1	73		2.4154	2.2594	2.418	2.2727	2.34137
129	42.73	42.79	69	LE01Gene07950.t1	LE01Gene07950.t1	49		2.486	2.4488	2.622	2.5989	2.53892
130	42.65	43.7	97.2	LE01Gene05312.t1	LE01Gene05312.t1	139		3.3877	3.2837	3.7031	3.6095	3.496
145	41.2	41.85	74.6	LE01Gene07632.t2	LE01Gene07632.t2	80		6.9387	6.6056	6.637	6.3795	6.6402
165	38.62	39.01	62.2	LE01Gene06132.t1	LE01Gene06132.t1	41		0.3666	0.363	0.4066	0.4066	0.3857
169	38.28	38.46	75.5	LE01Gene05031.t1	LE01Gene05031.t1	41		0.4186	0.429	0.4547	0.4696	0.442975
185	36.91	63.88	82	LE01Gene12649.t4	LE01Gene12649.t4	76		1.944	1.8983	2.1021	2.0642	2.00215
192	35.86	39.78	69.9	LE01Gene04040.t1	LE01Gene04040.t1	31		0.4384	0.4647	0.4537	0.4824	0.4598
194	35.65	36.25	81.4	LE01Gene05307.t1	LE01Gene05307.t1	57		2.1563	2.1562	1.9549	1.9668	2.05855
195	35.56	40.19	70	LE01Gene06191.t2	LE01Gene06191.t2	43		2.1697	2.1207	2.3002	2.2569	2.21188
320	29.05	31.16	55.2	LE01Gene01588.t1	LE01Gene01588.t1	26		2.1734	2.1932	2.3814	2.4155	2.29088
333	28.45	34.85	58.8	LE01Gene06989.t2	LE01Gene06989.t2	39		2.397	2.2598	1.8427	1.747	2.06162
341	28.13	28.18	24.8	LE01Gene07574.t2	LE01Gene07574.t2	18		2.3096	2.2429	2.0617	2.0101	2.15607
357	27.39	27.5	43.1	LE01Gene13788.t1	LE01Gene13788.t1	84		9.2986	9.0062	8.6922	8.4572	8.86355
370	26.66	27.47	33.1	LE01Gene05622.t1	LE01Gene05622.t1	55		5.0921	5.0749	5.9135	5.9281	5.50215
425	25.02	27.3	17.3	LE01Gene12913.t1	LE01Gene12913.t1	27		2.4356	2.3866	2.3271	2.2909	2.36005
446	24.01	26.49	68.7	LE01Gene00018.t1	LE01Gene00018.t1	30		2.3006	2.2448	2.3996	2.3558	2.3252
454	23.89	23.93	24.8	LE01Gene04793.t1	LE01Gene04793.t1	24		2.2211	2.1972	2.0565	2.0501	2.13123
489	22.62	24.09	47.1	LE01Gene02211.t1	LE01Gene02211.t1	23		0.455	0.5172	0.4783	0.5489	0.49985
497	22.43	22.6	34.8	LE01Gene02092.t1	LE01Gene02092.t1	36		4.7526	4.5383	4.5141	4.3374	4.5356
511	21.94	24.07	91.3	LE01Gene11226.t1	LE01Gene11226.t1	57		0.1581	0.1767	0.18	0.2034	0.17955
533	21.25	23.62	80.8	LE01Gene02680.t1	LE01Gene02680.t1	21		0.1781	0.1948	0.2012	0.2223	0.1991
538	21.14	21.17	34.9	LE01Gene04737.t1	LE01Gene04737.t1	29		2.2068	2.2428	1.8677	1.8974	2.05368
568	20.47	28.29	67.6	LE01Gene12309.t3	LE01Gene12309.t3	29		4.6148	4.5162	3.859	3.781	4.19275
666	18.19	19.16	47.8	LE01Gene12747.t1	LE01Gene12747.t1	19		3.6655	3.3037	3.2962	2.982	3.31185
686	17.87	17.97	31.9	LE01Gene02701.t2	LE01Gene02701.t2	12		3.6704	3.3533	2.6515	2.3403	3.00387
704	17.3	17.35	31.6	LE01Gene08997.t3	LE01Gene08997.t3	9		2.7706	2.7076	2.6495	2.6144	2.68552
713	17.06	17.12	70.5	LE01Gene02631.t1	LE01Gene02631.t1	45		2.4951	2.4558	2.3296	2.3073	2.39695
722	16.86	16.98	71.8	LE01Gene05328.t1	LE01Gene05328.t1	17		2.0714	2.005	2.2576	2.1983	2.13307
726	16.74	16.81	82.5	LE01Gene10170.t1	LE01Gene10170.t1	10		0.3441	0.3652	0.3785	0.4044	0.37305
738	16.45	16.57	38.3	LE01Gene01844.t1	LE01Gene01844.t1	24		2.4464	2.3015	2.6503	2.4932	2.47285
763	16.06	16.18	34.5	LE01Gene04089.t3	LE01Gene04089.t3	16		2.2369	2.0651	2.0915	1.9461	2.0849
764	16.03	22.32	70.4	LE01Gene07630.t1	LE01Gene07630.t1	34		5.379	5.1134	5.943	5.6849	5.53008
817	14.8	16.63	70.2	LE01Gene09325.t1	LE01Gene09325.t1	20		2.5627	2.7038	2.4823	2.6212	2.5925
841	14.38	15.36	49.8	LE01Gene07629.t1	LE01Gene07629.t1	17		4.0786	4.1163	4.2997	4.3324	4.20675
852	14.27	14.29	22.5	LE01Gene06046.t2	LE01Gene06046.t2	9		2.7498	2.5489	2.7269	2.5442	2.64245
880	14	14	32.4	LE01Gene08460.t1	LE01Gene08460.t1	10		2.6749	2.5787	2.588	2.5109	2.58813
881	14	14	30.3	LE01Gene07975.t1	LE01Gene07975.t1	9		3.3354	3.3154	2.7344	2.7386	3.03095
895	13.75	14.01	20.6	LE01Gene13055.t1	LE01Gene13055.t1	21		2.0251	1.8877	2.1061	1.9897	2.00215
932	13.09	15.52	40.5	LE01Gene00849.t1	LE01Gene00849.t1	11		0.47	0.4892	0.4825	0.5038	0.486375
956	12.68	12.84	27.1	LE01Gene13266.t1	LE01Gene13266.t1	11		2.1824	2.1592	2.0006	2.0281	2.09258
978	12.27	12.34	36.4	LE01Gene03223.t1	LE01Gene03223.t1	13		3.1933	3.2624	2.6286	2.6831	2.94185
990	12.1	14.16	20.9	LE01Gene00739.t1	LE01Gene00739.t1	9		5.0618	4.9832	5.9469	5.8895	5.47035
1006	12.03	12.03	39.6	LE01Gene04946.t1	LE01Gene04946.t1	19		3.0877	3.1458	3.3144	3.3867	3.23365
1009	12.02	12.02	23.6	LE01Gene12184.t1	LE01Gene12184.t1	10		2.1567	2.002	2.2081	2.0603	2.10677
1015	12	12.01	22.8	LE01Gene05323.t1	LE01Gene05323.t1	10		2.9495	2.9173	2.3421	2.3073	2.62905
1067	11.15	11.24	38.8	LE01Gene06016.t1	LE01Gene06016.t1	14		2.3162	2.2831	2.3273	2.3138	2.3101
1086	10.74	11.38	16.9	LE01Gene08225.t1	LE01Gene08225.t1	9		2.2769	2.1694	3.3116	3.1729	2.7327
1095	10.62	10.71	20.7	LE01Gene07715.t1	LE01Gene07715.t1	11		4.6613	4.4277	4.5458	4.3393	4.49352
1104	10.48	10.54	40.3	LE01Gene07086.t1	LE01Gene07086.t1	19		2.4337	2.1084	2.4169	2.1067	2.26642
1148	10.05	10.18	13.7	LE01Gene07138.t1	LE01Gene07138.t1	8		0.4044	0.447	0.4322	0.4794	0.44075
1151	10.03	10.11	10	LE01Gene04058.t1	LE01Gene04058.t1	6		2.519	2.6856	1.935	2.1084	2.312
1161	10	10	20.7	LE01Gene04284.t1	LE01Gene04284.t1	9		2.2534	2.2867	2.1276	2.2165	2.22105
1201	9.58	9.66	22.4	LE01Gene06415.t1	LE01Gene06415.t1	7		2.8155	2.7529	2.8349	2.7912	2.79863
1229	9.24	9.44	54.8	LE01Gene10731.t2	LE01Gene10731.t2	5		3.3331	2.7899	2.3871	2.0243	2.6336
1265	8.8	8.9	19.7	LE01Gene06426.t1	LE01Gene06426.t1	6		2.0732	2.0127	2.4247	2.3657	2.21908
1271	8.71	8.78	47.2	LE01Gene03985.t1	LE01Gene03985.t1	12		2.5035	3.1158	6.8255	8.5465	5.24783
1303	8.35	8.67	21.4	LE01Gene11793.t1	LE01Gene11793.t1	8		4.527	4.388	4.4458	4.3506	4.42785
1315	8.2	8.23	25.2	LE01Gene09622.t1	LE01Gene09622.t1	6		2.3963	2.1699	2.4594	2.2373	2.31573
1318	8.16	8.18	25.3	LE01Gene04829.t1	LE01Gene04829.t1	12		2.9977	3.0673	2.688	2.7619	2.87873
1342	8.04	8.05	50.5	LE01Gene05083.t1	LE01Gene05083.t1	24		4.4582	4.6186	3.889	4.0836	4.26235
1366	8	8.07	23.2	LE01Gene05418.t2	LE01Gene05418.t2	27		3.5903	3.5302	3.6908	3.6241	3.60885
1368	8	8.02	11.3	LE01Gene04347.t1	LE01Gene04347.t1	35		4.5883	4.3062	4.5801	4.3141	4.44717
1371	8	8.01	10.3	LE01Gene06300.t1	LE01Gene06300.t1	5		3.3762	2.8186	2.2307	1.8886	2.57852
1390	7.84	8.19	20.7	LE01Gene12866.t1	LE01Gene12866.t1	8		1.9879	1.9465	2.1079	2.106	2.03707
1391	7.83	8.1	16.4	LE01Gene10302.t1	LE01Gene10302.t1	8		3.4579	2.8659	2.97	2.4623	2.93902
1455	7.11	7.36	38.1	LE01Gene02600.t1	LE01Gene02600.t1	4		0.3205	0.302	0.3804	0.361	0.340975
1464	7.03	7.18	33.3	LE01Gene12816.t1	LE01Gene12816.t1	8		5.9415	5.9691	6.9461	7.0208	6.46938
1505	6.5	6.54	19	LE01Gene07443.t1	LE01Gene07443.t1	5		2.6091	2.2917	1.9743	1.7208	2.14898
1516	6.39	6.45	24	LE01Gene14017.t1	LE01Gene14017.t1	20		2.757	2.4891	1.8153	1.6489	2.17758
1526	6.31	6.43	21.2	LE01Gene06725.t3	LE01Gene06725.t3	5		2.0476	2.1438	2.91	3.108	2.55235
1542	6.21	6.3	20.7	LE01Gene02588.t1	LE01Gene02588.t1	4		0.4473	0.5329	0.4357	0.5175	0.48335
1552	6.13	6.15	10.5	LE01Gene07031.t1	LE01Gene07031.t1	4		2.2447	2.3138	2.2821	2.3598	2.3001
1560	6.07	6.11	21	LE01Gene11722.t2	LE01Gene11722.t2	4		1.8617	1.796	2.6861	2.6105	2.23857
1567	6.05	6.06	22.8	LE01Gene10050.t1	LE01Gene10050.t1	5		3.796	3.701	2.7676	2.7303	3.24872
1570	6.04	6.57	42.3	LE01Gene04051.t1	LE01Gene04051.t1	6		2.0269	1.73	3.342	2.8697	2.49215
1571	6.04	6.44	12.4	LE01Gene00047.t2	LE01Gene00047.t2	9		2.1384	1.9878	2.0378	1.906	2.0175
1579	6.02	6.04	13.9	LE01Gene03870.t1	LE01Gene03870.t1	3		2.1224	1.9926	9.0859	8.7048	5.47643
1584	6.01	6.06	19.7	LE01Gene08044.t1	LE01Gene08044.t1	5		3.9358	4.1331	2.8931	3.0588	3.5052
1590	6	8.01	24	LE01Gene08997.t5	LE01Gene08997.t5	6		1.7677	2.9824	1.3603	2.3089	2.10482
1593	6	6.39	17.7	LE01Gene02763.t1	LE01Gene02763.t1	5		2.2288	2.1917	1.8933	1.8722	2.0465
1599	6	6.01	19.7	LE01Gene06423.t1	LE01Gene06423.t1	4		3.1782	3.076	4.13	4.0401	3.60607
1607	6	6	30.4	LE01Gene03818.t1	LE01Gene03818.t1	5		2.1406	2.1979	2.3489	2.43	2.27935
1612	6	6	64.1	LE01Gene10272.t2	LE01Gene10272.t2	3		1.8817	2.1141	1.8943	2.1123	2.0006
1618	6	6	14.9	LE01Gene06973.t2	LE01Gene06973.t2	13		4.4071	3.9827	4.402	4.0053	4.19928
1621	6	6	37.3	LE01Gene05853.t1	LE01Gene05853.t1	4		3.7106	3.7235	3.1663	3.201	3.45035
1668	5.51	5.61	25	LE01Gene05545.t3	LE01Gene05545.t3	6		1.9715	1.8653	2.23	2.1147	2.04537
1676	5.46	5.6	17.9	LE01Gene08136.t1	LE01Gene08136.t1	3		2.3078	2.1716	1.987	1.8835	2.08747
1697	5.19	5.33	17.3	LE01Gene04612.t1	LE01Gene04612.t1	4		2.5535	2.4073	2.2231	2.0574	2.31033
1730	4.97	5.12	43	LE01Gene11861.t1	LE01Gene11861.t1	15		5.3751	5.0335	15.0416	14.0185	9.86717
1737	4.85	5.71	26.6	LE01Gene04813.t2	LE01Gene04813.t2	6		2.3013	2.1367	2.0071	1.8724	2.07938
1765	4.63	4.7	12.2	LE01Gene06657.t2	LE01Gene06657.t2	3		0.5429	0.5048	0.4538	0.4263	0.48195
1766	4.61	4.71	12.2	LE01Gene11286.t4	LE01Gene11286.t4	3		2.1619	1.5551	2.7824	2.0379	2.13433
1780	4.5	5.16	25.5	LE01Gene02303.t2	LE01Gene02303.t2	5		2.0114	2.322	2.1859	2.5973	2.27915
1786	4.45	4.59	18.6	LE01Gene04641.t1	LE01Gene04641.t1	3		2.8768	2.5925	2.4005	2.1472	2.50425
1845	4.16	4.49	51.5	LE01Gene00961.t1	LE01Gene00961.t1	5		2.3388	1.945	2.8903	2.4181	2.39805
1858	4.12	4.15	21	LE01Gene08614.t1	LE01Gene08614.t1	5		2.6548	2.5394	2.4712	2.3396	2.50125
1883	4.06	4.07	30.1	LE01Gene05216.t1	LE01Gene05216.t1	4		3.8162	6.7091	1.1605	2.0526	3.4346
1903	4.03	4.04	13.9	LE01Gene01684.t1	LE01Gene01684.t1	2		0.2896	0.5336	0.3032	0.5619	0.422075
1916	4.01	12.03	14.2	LE01Gene13992.t1	LE01Gene13992.t1	8		2.5524	2.5891	1.5645	1.6	2.0765
1917	4.01	6.21	11.5	LE01Gene05946.t1	LE01Gene05946.t1	3		2.4822	2.3473	2.1288	1.9082	2.21663
1941	4.01	4.01	17.7	LE01Gene06152.t1	LE01Gene06152.t1	6		3.4408	3.6148	3.1035	3.2647	3.35595
1943	4	8.05	27.6	LE01Gene04884.t2	LE01Gene04884.t2	4		2.5487	2.8193	3.0999	3.45	2.97947
1949	4	4.84	9.2	LE01Gene00944.t3	LE01Gene00944.t3	3		0.2929	0.3614	0.34	0.422	0.354075
1958	4	4.18	17.2	LE01Gene13368.t2	LE01Gene13368.t2	7		3.7817	4.1509	3.3452	3.6941	3.74297
1983	4	4.01	12.3	LE01Gene07085.t1	LE01Gene07085.t1	3		2.7169	1.9345	2.4211	1.7436	2.20403
2002	4	4	9.9	LE01Gene06416.t1	LE01Gene06416.t1	3		6.7338	6.9235	7.1536	7.3755	7.0466
2008	4	4	60.5	LE01Gene12503.t1	LE01Gene12503.t1	2		0.4911	0.4608	0.4634	0.4384	0.463425
2010	4	4	11	LE01Gene10892.t2	LE01Gene10892.t2	3		2.081	2.0538	2.5753	2.5605	2.31765
2016	4	4	10.2	LE01Gene08330.t1	LE01Gene08330.t1	3		2.4092	2.5329	2.4043	2.5431	2.47237
2021	4	4	29.7	LE01Gene13670.t1	LE01Gene13670.t1	3		3.2008	2.9176	3.2304	2.9635	3.07808
2050	3.8	4.23	11.3	LE01Gene11039.t1	LE01Gene11039.t1	6		2.1082	2.2423	2.7076	2.8972	2.48882
2053	3.79	4.11	18	LE01Gene09222.t1	LE01Gene09222.t1	3		1.9323	1.8823	2.416	2.3617	2.14807
2116	3.36	5.81	10.5	LE01Gene06455.t2	LE01Gene06455.t2	4		0.3805	0.3774	0.3436	0.3429	0.3611
2117	3.35	3.67	15.2	LE01Gene03561.t1	LE01Gene03561.t1	2		0.9855	2.1192	4.1039	8.8789	4.02187
2123	3.33	3.51	13	LE01Gene11399.t2	LE01Gene11399.t2	3		1.8104	2.5979	1.5028	2.1697	2.0202
2138	3.21	4.81	23.6	LE01Gene10169.t1	LE01Gene10169.t1	4		2.2383	2.2204	2.6907	2.7031	2.46312
2175	2.95	3.12	46.6	LE01Gene05221.t1	LE01Gene05221.t1	5		4.7952	3.6064	5.4901	4.1541	4.51145
2178	2.91	3.11	49.7	LE01Gene04217.t1	LE01Gene04217.t1	22		10.113	9.5952	9.3412	8.9168	9.49155
2184	2.84	3	8.1	LE01Gene02765.t1	LE01Gene02765.t1	2		0.3324	0.5445	0.3569	0.5772	0.45275
2232	2.45	2.52	16.7	LE01Gene00247.t1	LE01Gene00247.t1	4		4.4978	3.8537	3.4234	2.9509	3.68145
2237	2.39	2.94	7.2	LE01Gene07684.t2	LE01Gene07684.t2	4		0.7639	0.3718	0.5705	0.2794	0.4964
2245	2.37	2.43	8.1	LE01Gene07356.t1	LE01Gene07356.t1	2		2.3604	2.4639	1.7546	1.8552	2.10853
2251	2.35	3.23	8.8	LE01Gene01096.t1	LE01Gene01096.t1	3		3.6488	3.7907	3.6369	3.7969	3.71833
2257	2.34	2.4	11.2	LE01Gene00726.t1	LE01Gene00726.t1	4		2.4201	2.4491	2.79	2.8585	2.62942
2262	2.3	2.37	24.9	LE01Gene05588.t3	LE01Gene05588.t3	6		7.8454	7.5308	6.9878	6.7484	7.2781
2264	2.28	3.19	16.8	LE01Gene11861.t2	LE01Gene11861.t2	4		2.1409	2.0536	2.0467	1.9613	2.05062
2326	2.08	2.11	33.3	LE01Gene02980.t1	LE01Gene02980.t1	11		4.1778	3.5711	4.3659	3.7546	3.96735
2328	2.08	2.1	25	LE01Gene00097.t2	LE01Gene00097.t2	2		4.1637	3.8987	1.5827	1.491	2.78402
2334	2.06	3.07	12.6	LE01Gene07769.t2	LE01Gene07769.t2	3		1.5492	1.5091	2.5746	2.5232	2.03903
2346	2.04	2.4	17.6	LE01Gene13124.t1	LE01Gene13124.t1	4		5.8023	8.1248	2.069	2.9148	4.72772
2375	2.03	2.04	10.4	LE01Gene02688.t1	LE01Gene02688.t1	2		0.2388	0.2448	0.2202	0.2265	0.232575
2399	2.01	15.77	69.2	LE01Gene05309.t1	LE01Gene05309.t1	40		2.0293	2.4289	1.9076	2.2971	2.16573
2446	2.01	2.01	7.6	LE01Gene11537.t1	LE01Gene11537.t1	2		1.8902	1.9276	2.5089	2.5662	2.22323
2456	2.01	2.01	20.7	LE01Gene04546.t2	LE01Gene04546.t2	5		2.243	2.1416	2.1942	2.1077	2.17162
2478	2	4	17.2	LE01Gene10166.t1	LE01Gene10166.t1	2		6.8942	5.6988	4.0534	3.3709	5.00432
2480	2	4	8	LE01Gene03405.t1	LE01Gene03405.t1	2		0.418	0.3771	0.2902	0.2634	0.337175
2486	2	2.61	35.3	LE01Gene03955.t1	LE01Gene03955.t1	3		5.149	6.7494	3.4844	4.5951	4.99447
2489	2	2.47	7	LE01Gene08917.t1	LE01Gene08917.t1	3		4.5188	3.5289	3.462	2.72	3.55742
2495	2	2.13	6.3	LE01Gene08609.t2	LE01Gene08609.t2	2		2.8108	2.4285	3.7423	3.2531	3.05868
2501	2	2.08	19.6	LE01Gene13555.t1	LE01Gene13555.t1	2		1.4873	1.1628	6.0568	4.7639	3.3677
2511	2	2.06	22	LE01Gene13910.t1	LE01Gene13910.t1	2		0.4483	0.4992	0.43	0.4817	0.4648
2540	2	2.02	12	LE01Gene12740.t2	LE01Gene12740.t2	2		3.3397	2.1993	2.9083	1.9269	2.59355
2547	2	2.02	19.2	LE01Gene12441.t1	LE01Gene12441.t1	3		3.4526	2.4238	2.3596	1.6666	2.47565
2548	2	2.02	6.6	LE01Gene08402.t3	LE01Gene08402.t3	2		0.4046	0.6203	0.3271	0.5045	0.464125
2577	2	2.01	27.1	LE01Gene11372.t1	LE01Gene11372.t1	2		0.8092	0.3735	0.5033	0.2249	0.477725
2582	2	2.01	7.2	LE01Gene04431.t1	LE01Gene04431.t1	2		0.3276	0.4095	0.255	0.3269	0.32975
2605	2	2.01	8.9	LE01Gene05195.t1	LE01Gene05195.t1	2		4.8338	4.6011	9.8831	9.4643	7.19557
2627	2	2.01	12.2	LE01Gene10225.t1	LE01Gene10225.t1	3		2.0905	2.0819	2.0678	2.0719	2.07802
2628	2	2.01	17	LE01Gene06339.t1	LE01Gene06339.t1	3		0.3106	0.555	0.2999	0.5392	0.426175
2650	2	2	9.5	LE01Gene09525.t1	LE01Gene09525.t1	2		0.8336	1.0141	11.2715	13.7953	6.72862
2721	2	2	9.6	LE01Gene00313.t1	LE01Gene00313.t1	2		0.3434	0.5516	0.369	0.5965	0.465125
2795	2	2	14.1	LE01Gene05794.t1	LE01Gene05794.t1	2		3.6854	10.1667	0.9494	2.635	4.35913
2814	1.85	2.02	10.4	LE01Gene03829.t1	LE01Gene03829.t1	2		1.0391	2.0111	1.9127	3.7245	2.17185
2819	1.83	2.02	12.6	LE01Gene13397.t1	LE01Gene13397.t1	3		2.3166	2.3609	1.8966	1.9446	2.12968
2828	1.8	2	14.4	LE01Gene13515.t1	LE01Gene13515.t1	2		0.3565	0.5027	0.2952	0.4188	0.3933
2874	1.42	1.75	10.3	LE01Gene04390.t5	LE01Gene04390.t5	2		5.1151	1.5816	6.3349	1.9707	3.75058

## Sheet: 3-1
Table S2B.The results of the DEPs when 3-1
N	Unused	Total	% Cov	Accession #	Name	Peptides(95%)	Species	117:113	118:113	117:114	118:114	3-1
1	129.12	129.12	95.1	LE01Gene04245.t1	LE01Gene04245.t1	497		2.2184	1.811	2.5179	2.0653	2.15315
9	90.77	91.05	74.6	LE01Gene10868.t1	LE01Gene10868.t1	103		3.6095	3.0289	3.4793	2.9158	3.25838
39	64.59	64.66	88.8	LE01Gene12649.t3	LE01Gene12649.t3	91		2.3439	2.0505	2.4476	2.1416	2.2459
47	60.94	61.15	82.4	LE01Gene02536.t1	LE01Gene02536.t1	120		0.4754	0.3928	0.5751	0.4729	0.47905
49	60.74	61.67	93.9	LE01Gene04822.t1	LE01Gene04822.t1	62		2.1445	2.0102	2.1795	2.0522	2.0966
52	58.68	58.74	97.5	LE01Gene08639.t1	LE01Gene08639.t1	134		2.3975	1.9148	2.5751	2.0624	2.23745
82	50.9	51.01	72.5	LE01Gene03297.t1	LE01Gene03297.t1	162		2.3112	2.01	2.3557	2.0448	2.18043
98	47.95	59.51	80.2	LE01Gene05169.t1	LE01Gene05169.t1	177		4.1642	3.3673	4.3361	3.5234	3.84775
101	47.45	49.44	59.4	LE01Gene02678.t2	LE01Gene02678.t2	64		0.4529	0.4256	0.4675	0.4388	0.4462
129	42.73	42.79	69	LE01Gene07950.t1	LE01Gene07950.t1	49		2.9011	2.3885	3.0824	2.5433	2.72883
130	42.65	43.7	97.2	LE01Gene05312.t1	LE01Gene05312.t1	139		2.199	1.869	2.4596	2.0863	2.15347
145	41.2	41.85	74.6	LE01Gene07632.t2	LE01Gene07632.t2	80		5.4306	4.9317	5.3194	4.8455	5.1318
169	38.28	38.46	75.5	LE01Gene05031.t1	LE01Gene05031.t1	41		0.4609	0.4362	0.5021	0.4745	0.468425
185	36.91	63.88	82	LE01Gene12649.t4	LE01Gene12649.t4	76		2.2314	1.9036	2.416	2.0567	2.15193
192	35.86	39.78	69.9	LE01Gene04040.t1	LE01Gene04040.t1	31		0.4527	0.4528	0.4677	0.4669	0.460025
195	35.56	40.19	70	LE01Gene06191.t2	LE01Gene06191.t2	43		2.337	2.1032	2.4919	2.2457	2.29445
197	35.52	35.62	65.6	LE01Gene05149.t1	LE01Gene05149.t1	23		0.4286	0.4596	0.4372	0.4669	0.448075
357	27.39	27.5	43.1	LE01Gene13788.t1	LE01Gene13788.t1	84		6.2671	5.4589	6.3677	5.3921	5.87145
370	26.66	27.47	33.1	LE01Gene05622.t1	LE01Gene05622.t1	55		3.3873	2.7807	3.9666	3.2663	3.35023
497	22.43	22.6	34.8	LE01Gene02092.t1	LE01Gene02092.t1	36		5.0257	4.3767	4.7609	4.1393	4.57565
511	21.94	24.07	91.3	LE01Gene11226.t1	LE01Gene11226.t1	57		0.2029	0.1633	0.2332	0.1881	0.196875
533	21.25	23.62	80.8	LE01Gene02680.t1	LE01Gene02680.t1	21		0.1609	0.1495	0.1823	0.1677	0.1651
582	20.12	20.16	93.8	LE01Gene12197.t1	LE01Gene12197.t1	44		0.4883	0.3985	0.5508	0.4497	0.471825
622	19.13	19.19	89.7	LE01Gene05314.t1	LE01Gene05314.t1	20		2.7149	2.4387	2.57	2.3076	2.5078
670	18.11	18.11	32.3	LE01Gene07614.t1	LE01Gene07614.t1	17		2.4387	2.1875	2.6899	2.4425	2.43965
686	17.87	17.97	31.9	LE01Gene02701.t2	LE01Gene02701.t2	12		5.0365	3.9969	3.4545	2.8992	3.84678
713	17.06	17.12	70.5	LE01Gene02631.t1	LE01Gene02631.t1	45		3.0044	2.9806	2.8165	2.7973	2.8997
722	16.86	16.98	71.8	LE01Gene05328.t1	LE01Gene05328.t1	17		2.3722	1.9928	2.5601	2.1511	2.26905
726	16.74	16.81	82.5	LE01Gene10170.t1	LE01Gene10170.t1	10		0.4232	0.4438	0.4653	0.4856	0.454475
745	16.37	16.51	56.1	LE01Gene06514.t1	LE01Gene06514.t1	18		2.5801	2.3361	2.4049	2.1784	2.37487
763	16.06	16.18	34.5	LE01Gene04089.t3	LE01Gene04089.t3	16		2.4658	2.1061	2.3134	1.9742	2.21488
764	16.03	22.32	70.4	LE01Gene07630.t1	LE01Gene07630.t1	34		5.5138	4.9171	6.1151	5.4787	5.50617
817	14.8	16.63	70.2	LE01Gene09325.t1	LE01Gene09325.t1	20		2.7949	2.7458	2.6926	2.6481	2.72035
841	14.38	15.36	49.8	LE01Gene07629.t1	LE01Gene07629.t1	17		4.5978	3.7772	4.896	4.0057	4.31918
852	14.27	14.29	22.5	LE01Gene06046.t2	LE01Gene06046.t2	9		2.5783	2.3724	2.5372	2.3329	2.4552
880	14	14	32.4	LE01Gene08460.t1	LE01Gene08460.t1	10		2.1521	2.0214	2.0839	1.9475	2.05123
881	14	14	30.3	LE01Gene07975.t1	LE01Gene07975.t1	9		4.1487	3.6192	3.4114	2.9598	3.53477
932	13.09	15.52	40.5	LE01Gene00849.t1	LE01Gene00849.t1	11		0.4657	0.4518	0.4802	0.4635	0.4653
954	12.7	12.9	30.6	LE01Gene02589.t1	LE01Gene02589.t1	10		2.31	2.0485	2.3563	2.0748	2.1974
978	12.27	12.34	36.4	LE01Gene03223.t1	LE01Gene03223.t1	13		3.1378	2.7649	2.5876	2.2728	2.69077
990	12.1	14.16	20.9	LE01Gene00739.t1	LE01Gene00739.t1	9		3.2419	3.2631	3.7933	3.819	3.52933
1006	12.03	12.03	39.6	LE01Gene04946.t1	LE01Gene04946.t1	19		2.0882	1.9949	2.2422	2.1497	2.11875
1009	12.02	12.02	23.6	LE01Gene12184.t1	LE01Gene12184.t1	10		2.1734	1.9781	2.2268	2.0265	2.1012
1021	11.9	12	54.8	LE01Gene04434.t2	LE01Gene04434.t2	7		2.0475	2.0032	2.0502	2.022	2.03072
1067	11.15	11.24	38.8	LE01Gene06016.t1	LE01Gene06016.t1	14		2.157	2.0958	2.17	2.099	2.13045
1086	10.74	11.38	16.9	LE01Gene08225.t1	LE01Gene08225.t1	9		2.3526	1.8343	3.4274	2.6668	2.57028
1095	10.62	10.71	20.7	LE01Gene07715.t1	LE01Gene07715.t1	11		2.8745	2.8671	2.7985	2.7929	2.83325
1104	10.48	10.54	40.3	LE01Gene07086.t1	LE01Gene07086.t1	19		2.5839	2.3837	2.5714	2.3664	2.47635
1137	10.16	10.26	35	LE01Gene11487.t1	LE01Gene11487.t1	12		2.5889	2.4016	2.2782	2.117	2.34642
1161	10	10	20.7	LE01Gene04284.t1	LE01Gene04284.t1	9		2.4198	2.2967	2.2954	2.2108	2.30567
1184	9.82	9.92	28.8	LE01Gene07758.t1	LE01Gene07758.t1	10		0.5818	0.4133	0.5451	0.3899	0.482525
1229	9.24	9.44	54.8	LE01Gene10731.t2	LE01Gene10731.t2	5		2.6617	2.5601	1.9112	1.8349	2.24198
1271	8.71	8.78	47.2	LE01Gene03985.t1	LE01Gene03985.t1	12		0.8122	1.8872	2.2154	5.1504	2.5163
1303	8.35	8.67	21.4	LE01Gene11793.t1	LE01Gene11793.t1	8		2.4246	2.4946	2.3964	2.4801	2.44893
1318	8.16	8.18	25.3	LE01Gene04829.t1	LE01Gene04829.t1	12		4.4495	3.7463	3.9749	3.355	3.88143
1331	8.09	8.11	72.6	LE01Gene00278.t1	LE01Gene00278.t1	6		0.4187	0.4415	0.5071	0.5325	0.47495
1342	8.04	8.05	50.5	LE01Gene05083.t1	LE01Gene05083.t1	24		2.365	1.9804	2.1588	1.7472	2.06285
1366	8	8.07	23.2	LE01Gene05418.t2	LE01Gene05418.t2	27		2.2897	1.8622	2.356	1.9058	2.10342
1371	8	8.01	10.3	LE01Gene06300.t1	LE01Gene06300.t1	5		2.8881	2.6161	1.9075	1.7192	2.28273
1372	8	8	19.2	LE01Gene04165.t1	LE01Gene04165.t1	8		2.6291	2.2016	2.9444	2.4607	2.55895
1391	7.83	8.1	16.4	LE01Gene10302.t1	LE01Gene10302.t1	8		1.8564	2.5145	1.605	2.1685	2.0361
1438	7.24	10.55	27.3	LE01Gene12738.t1	LE01Gene12738.t1	7		2.8456	0.8342	3.1119	1.3876	2.04483
1455	7.11	7.36	38.1	LE01Gene02600.t1	LE01Gene02600.t1	4		0.3361	0.3279	0.4019	0.3924	0.364575
1464	7.03	7.18	33.3	LE01Gene12816.t1	LE01Gene12816.t1	8		3.3163	2.6111	3.8788	3.0557	3.21548
1485	6.74	6.97	27.3	LE01Gene08287.t1	LE01Gene08287.t1	5		2.8342	2.751	2.9951	2.9538	2.88353
1489	6.71	6.89	16.7	LE01Gene01882.t1	LE01Gene01882.t1	4		2.0186	1.9075	2.2346	2.1072	2.06698
1516	6.39	6.45	24	LE01Gene14017.t1	LE01Gene14017.t1	20		2.5928	2.3114	1.708	1.5235	2.03392
1529	6.3	6.4	13.8	LE01Gene08475.t1	LE01Gene08475.t1	4		2.5764	2.8651	3.2237	3.5866	3.06295
1567	6.05	6.06	22.8	LE01Gene10050.t1	LE01Gene10050.t1	5		5.1493	3.9079	3.772	2.9258	3.93875
1571	6.04	6.44	12.4	LE01Gene00047.t2	LE01Gene00047.t2	9		2.4862	2.2661	2.3707	2.1649	2.32197
1579	6.02	6.04	13.9	LE01Gene03870.t1	LE01Gene03870.t1	3		1.2552	1.7117	5.3007	7.1495	3.85427
1586	6.01	6.01	10.5	LE01Gene07273.t1	LE01Gene07273.t1	5		1.9989	2.0465	1.9791	2.0355	2.015
1599	6	6.01	19.7	LE01Gene06423.t1	LE01Gene06423.t1	4		2.8671	2.4651	3.7731	3.2321	3.08435
1607	6	6	30.4	LE01Gene03818.t1	LE01Gene03818.t1	5		2.6826	1.9877	2.9474	2.1838	2.45038
1610	6	6	16.4	LE01Gene12644.t1	LE01Gene12644.t1	3		0.4857	0.471	0.4053	0.3937	0.438925
1618	6	6	14.9	LE01Gene06973.t2	LE01Gene06973.t2	13		3.2795	2.4149	3.3464	2.4901	2.88273
1621	6	6	37.3	LE01Gene05853.t1	LE01Gene05853.t1	4		2.3827	2.3638	2.0346	2.0171	2.19955
1676	5.46	5.6	17.9	LE01Gene08136.t1	LE01Gene08136.t1	3		2.5368	1.9722	2.1942	1.702	2.1013
1730	4.97	5.12	43	LE01Gene11861.t1	LE01Gene11861.t1	15		2.951	2.9816	6.9756	7.0336	4.98545
1766	4.61	4.71	12.2	LE01Gene11286.t4	LE01Gene11286.t4	3		1.8015	1.7453	2.2958	2.2333	2.01898
1786	4.45	4.59	18.6	LE01Gene04641.t1	LE01Gene04641.t1	3		2.9225	2.8031	2.379	2.2659	2.59262
1857	4.12	4.21	11.4	LE01Gene02398.t1	LE01Gene02398.t1	3		3.9235	5.1859	0.8091	1.0701	2.74715
1858	4.12	4.15	21	LE01Gene08614.t1	LE01Gene08614.t1	5		3.4924	3.0499	3.1625	2.8062	3.12775
1883	4.06	4.07	30.1	LE01Gene05216.t1	LE01Gene05216.t1	4		5.0405	10.8073	1.5335	3.2898	5.16777
1916	4.01	12.03	14.2	LE01Gene13992.t1	LE01Gene13992.t1	8		3.0391	2.8439	1.8744	1.7501	2.37688
1943	4	8.05	27.6	LE01Gene04884.t2	LE01Gene04884.t2	4		1.4176	2.2909	1.725	2.7892	2.05567
1949	4	4.84	9.2	LE01Gene00944.t3	LE01Gene00944.t3	3		0.3602	0.4722	0.4183	0.5487	0.44985
1958	4	4.18	17.2	LE01Gene13368.t2	LE01Gene13368.t2	7		3.8607	4.1626	3.4165	3.6858	3.7814
2002	4	4	9.9	LE01Gene06416.t1	LE01Gene06416.t1	3		4.8812	4.1689	5.1703	4.4319	4.66308
2050	3.8	4.23	11.3	LE01Gene11039.t1	LE01Gene11039.t1	6		2.0416	2.1787	2.6231	2.8009	2.41107
2077	3.59	4.1	33.1	LE01Gene12447.t1	LE01Gene12447.t1	3		0.5093	0.4513	0.4932	0.4354	0.4723
2117	3.35	3.67	15.2	LE01Gene03561.t1	LE01Gene03561.t1	2		1.5386	2.3406	6.4101	9.7571	5.0116
2123	3.33	3.51	13	LE01Gene11399.t2	LE01Gene11399.t2	3		0.085	0.853	0.0706	0.7088	0.42935
2138	3.21	4.81	23.6	LE01Gene10169.t1	LE01Gene10169.t1	4		2.1014	1.9764	2.5984	2.4356	2.27795
2146	3.18	3.37	16.6	LE01Gene10066.t2	LE01Gene10066.t2	3		0.4458	0.3807	0.5566	0.4756	0.464675
2175	2.95	3.12	46.6	LE01Gene05221.t1	LE01Gene05221.t1	5		2.0778	1.7979	2.3799	2.0605	2.07903
2178	2.91	3.11	49.7	LE01Gene04217.t1	LE01Gene04217.t1	22		13.2547	10.0618	12.2486	9.3033	11.2171
2184	2.84	3	8.1	LE01Gene02765.t1	LE01Gene02765.t1	2		0.3339	0.4571	0.3556	0.485	0.4079
2222	2.51	2.58	20	LE01Gene04714.t1	LE01Gene04714.t1	2		0.4776	0.3398	0.6553	0.4619	0.48365
2232	2.45	2.52	16.7	LE01Gene00247.t1	LE01Gene00247.t1	4		2.3082	2.8719	1.7576	2.1881	2.28145
2251	2.35	3.23	8.8	LE01Gene01096.t1	LE01Gene01096.t1	3		4.4908	4.0019	4.4495	3.9894	4.2329
2257	2.34	2.4	11.2	LE01Gene00726.t1	LE01Gene00726.t1	4		2.3921	1.9706	2.7872	2.3	2.36247
2262	2.3	2.37	24.9	LE01Gene05588.t3	LE01Gene05588.t3	6		4.8692	3.9752	4.3389	3.5443	4.1819
2264	2.28	3.19	16.8	LE01Gene11861.t2	LE01Gene11861.t2	4		2.3296	1.8819	2.2506	1.81	2.06803
2326	2.08	2.11	33.3	LE01Gene02980.t1	LE01Gene02980.t1	11		2.1627	2.0728	2.2611	2.1683	2.16622
2328	2.08	2.1	25	LE01Gene00097.t2	LE01Gene00097.t2	2		3.2305	3.4423	1.2286	1.3099	2.30283
2346	2.04	2.4	17.6	LE01Gene13124.t1	LE01Gene13124.t1	4		2.5986	4.0245	0.927	1.4365	2.24665
2375	2.03	2.04	10.4	LE01Gene02688.t1	LE01Gene02688.t1	2		0.231	0.3577	0.2154	0.3298	0.283475
2426	2.01	2.03	7.1	LE01Gene07167.t1	LE01Gene07167.t1	2		3.643	2.8038	2.2907	1.7732	2.62767
2456	2.01	2.01	20.7	LE01Gene04546.t2	LE01Gene04546.t2	5		3.2434	2.6517	3.1742	2.5965	2.91645
2473	2	4.01	18.8	LE01Gene07894.t1	LE01Gene07894.t1	2		2.1587	2.04	2.6474	2.5034	2.33738
2478	2	4	17.2	LE01Gene10166.t1	LE01Gene10166.t1	2		4.2223	8.1286	2.4835	4.7839	4.90457
2486	2	2.61	35.3	LE01Gene03955.t1	LE01Gene03955.t1	3		4.2376	3.335	2.8689	2.2591	3.17515
2489	2	2.47	7	LE01Gene08917.t1	LE01Gene08917.t1	3		0.703	3.9014	0.5388	2.992	2.0338
2495	2	2.13	6.3	LE01Gene08609.t2	LE01Gene08609.t2	2		1.9203	1.547	2.5579	2.0618	2.02175
2501	2	2.08	19.6	LE01Gene13555.t1	LE01Gene13555.t1	2		0.9521	0.8367	3.8789	3.4109	2.26965
2511	2	2.06	22	LE01Gene13910.t1	LE01Gene13910.t1	2		0.4563	0.5247	0.4378	0.5038	0.48065
2540	2	2.02	12	LE01Gene12740.t2	LE01Gene12740.t2	2		3.6005	2.7927	3.1368	2.4344	2.9911
2547	2	2.02	19.2	LE01Gene12441.t1	LE01Gene12441.t1	3		2.6773	4.0139	1.8305	2.746	2.81692
2577	2	2.01	27.1	LE01Gene11372.t1	LE01Gene11372.t1	2		0.5395	0.6866	0.3197	0.4097	0.488875
2582	2	2.01	7.2	LE01Gene04431.t1	LE01Gene04431.t1	2		0.4187	0.5192	0.3328	0.4101	0.4202
2605	2	2.01	8.9	LE01Gene05195.t1	LE01Gene05195.t1	2		1.0838	1.7488	2.2169	3.579	2.15713
2608	2	2.01	6.1	LE01Gene00946.t1	LE01Gene00946.t1	2		2.9957	3.2589	1.6376	1.7825	2.41867
2627	2	2.01	12.2	LE01Gene10225.t1	LE01Gene10225.t1	3		2.1447	2.0851	2.1224	2.0646	2.1042
2650	2	2	9.5	LE01Gene09525.t1	LE01Gene09525.t1	2		1.1534	0.6522	15.6012	8.8277	6.55863
2663	2	2	9.2	LE01Gene05485.t3	LE01Gene05485.t3	2		0.6939	1.5585	2.0826	4.6802	2.2538
2795	2	2	14.1	LE01Gene05794.t1	LE01Gene05794.t1	2		3.588	5.0108	0.9247	1.2922	2.70392
2874	1.42	1.75	10.3	LE01Gene04390.t5	LE01Gene04390.t5	2		1.7921	5.1752	2.2204	6.4159	3.9009

## Sheet: 4-1
Table S2C.The results of the DEPs when 4-1
N	Unused	Total	% Cov	Accession #	Name	Peptides(95%)	Species	119:113	121:113	119:114	121:114	4-1
1	129.12	129.12	95.1	LE01Gene04245.t1	LE01Gene04245.t1	497		2.4923	2.752	2.8413	3.1242	2.80245
9	90.77	91.05	74.6	LE01Gene10868.t1	LE01Gene10868.t1	103		6.6575	7.8603	6.5163	7.6663	7.1751
27	71.25	71.85	75.9	LE01Gene03252.t3	LE01Gene03252.t3	100		0.4374	0.4758	0.5043	0.5484	0.491475
39	64.59	64.66	88.8	LE01Gene12649.t3	LE01Gene12649.t3	91		2.0806	2.1423	2.1789	2.2371	2.15972
49	60.74	61.67	93.9	LE01Gene04822.t1	LE01Gene04822.t1	62		2.2727	2.3	2.3364	2.3566	2.31642
52	58.68	58.74	97.5	LE01Gene08639.t1	LE01Gene08639.t1	134		2.5042	3.0217	2.6961	3.241	2.86575
82	50.9	51.01	72.5	LE01Gene03297.t1	LE01Gene03297.t1	162		2.4346	2.6891	2.4686	2.7116	2.57597
98	47.95	59.51	80.2	LE01Gene05169.t1	LE01Gene05169.t1	177		4.4818	5.2822	4.7005	5.5138	4.99457
101	47.45	49.44	59.4	LE01Gene02678.t2	LE01Gene02678.t2	64		0.467	0.4657	0.4839	0.4808	0.47435
129	42.73	42.79	69	LE01Gene07950.t1	LE01Gene07950.t1	49		3.5761	4.0732	3.821	4.3416	3.95297
130	42.65	43.7	97.2	LE01Gene05312.t1	LE01Gene05312.t1	139		2.5768	2.8933	2.8865	3.2367	2.89832
145	41.2	41.85	74.6	LE01Gene07632.t2	LE01Gene07632.t2	80		3.2901	3.4061	3.2414	3.3341	3.31792
165	38.62	39.01	62.2	LE01Gene06132.t1	LE01Gene06132.t1	41		0.371	0.3611	0.4139	0.4045	0.387625
192	35.86	39.78	69.9	LE01Gene04040.t1	LE01Gene04040.t1	31		0.4061	0.4432	0.4215	0.4588	0.4324
195	35.56	40.19	70	LE01Gene06191.t2	LE01Gene06191.t2	43		2.1746	2.2692	2.3234	2.4231	2.29757
197	35.52	35.62	65.6	LE01Gene05149.t1	LE01Gene05149.t1	23		0.4673	0.5048	0.479	0.518	0.492275
230	33.29	33.32	66.1	LE01Gene10519.t2	LE01Gene10519.t2	32		2.0474	1.9432	2.2742	2.1593	2.10602
274	31.24	31.3	85.2	LE01Gene10767.t1	LE01Gene10767.t1	66		1.714	2.0407	1.9508	2.3153	2.0052
317	29.19	29.54	49.3	LE01Gene06019.t1	LE01Gene06019.t1	30		2.3561	2.4713	2.0374	2.1271	2.24797
324	28.83	30.24	42.5	LE01Gene05313.t1	LE01Gene05313.t1	42		1.876	2.1069	1.9744	2.2056	2.04073
333	28.45	34.85	58.8	LE01Gene06989.t2	LE01Gene06989.t2	39		2.2911	2.3284	1.7694	1.8048	2.04842
343	28.05	30.27	55.8	LE01Gene09434.t1	LE01Gene09434.t1	18		0.4758	0.4502	0.4964	0.4725	0.473725
348	27.73	28.01	48.9	LE01Gene06588.t1	LE01Gene06588.t1	17		1.942	2.1994	2.0756	2.3331	2.13753
357	27.39	27.5	43.1	LE01Gene13788.t1	LE01Gene13788.t1	84		5.5492	5.8681	5.5371	5.5949	5.63732
370	26.66	27.47	33.1	LE01Gene05622.t1	LE01Gene05622.t1	55		2.2933	2.053	2.7013	2.4128	2.3651
382	26.24	26.36	72	LE01Gene11683.t1	LE01Gene11683.t1	27		2.2898	2.5535	2.5384	2.8336	2.55383
425	25.02	27.3	17.3	LE01Gene12913.t1	LE01Gene12913.t1	27		2.0338	2.0613	1.9576	1.9821	2.0087
446	24.01	26.49	68.7	LE01Gene00018.t1	LE01Gene00018.t1	30		1.8874	2.2274	2.0007	2.3572	2.11817
464	23.54	23.64	57.7	LE01Gene09888.t2	LE01Gene09888.t2	17		1.9829	2.2251	2.1541	2.4133	2.19385
479	23.06	23.59	36.2	LE01Gene07717.t1	LE01Gene07717.t1	18		1.9368	2.1808	2.0338	2.2642	2.1039
489	22.62	24.09	47.1	LE01Gene02211.t1	LE01Gene02211.t1	23		0.3697	0.4025	0.3926	0.4266	0.39785
497	22.43	22.6	34.8	LE01Gene02092.t1	LE01Gene02092.t1	36		3.4042	3.262	3.245	3.1612	3.2681
511	21.94	24.07	91.3	LE01Gene11226.t1	LE01Gene11226.t1	57		0.1647	0.1824	0.1903	0.2098	0.1868
533	21.25	23.62	80.8	LE01Gene02680.t1	LE01Gene02680.t1	21		0.1269	0.1537	0.1432	0.1713	0.148775
622	19.13	19.19	89.7	LE01Gene05314.t1	LE01Gene05314.t1	20		2.5536	2.7199	2.4239	2.5758	2.5683
649	18.73	18.91	17.7	LE01Gene05655.t1	LE01Gene05655.t1	10		2.0501	2.1163	2.0098	2.0659	2.06053
669	18.11	18.22	25.8	LE01Gene11488.t1	LE01Gene11488.t1	11		1.972	2.1362	1.9701	2.1315	2.05245
670	18.11	18.11	32.3	LE01Gene07614.t1	LE01Gene07614.t1	17		3.049	3.3759	3.3177	3.6545	3.34928
678	18	18.01	51.3	LE01Gene04862.t1	LE01Gene04862.t1	11		0.4766	0.4242	0.4977	0.4417	0.46005
686	17.87	17.97	31.9	LE01Gene02701.t2	LE01Gene02701.t2	12		6.0871	7.2207	4.1813	4.9294	5.60463
694	17.57	19.86	25.6	LE01Gene07165.t3	LE01Gene07165.t3	9		0.4874	0.4956	0.4907	0.502	0.493925
713	17.06	17.12	70.5	LE01Gene02631.t1	LE01Gene02631.t1	45		3.7727	4.1977	3.5691	3.9657	3.8763
722	16.86	16.98	71.8	LE01Gene05328.t1	LE01Gene05328.t1	17		2.4042	2.4312	2.6071	2.6383	2.5202
726	16.74	16.81	82.5	LE01Gene10170.t1	LE01Gene10170.t1	10		0.3575	0.3834	0.3948	0.428	0.390925
738	16.45	16.57	38.3	LE01Gene01844.t1	LE01Gene01844.t1	24		1.9406	2.0408	2.119	2.2254	2.08145
745	16.37	16.51	56.1	LE01Gene06514.t1	LE01Gene06514.t1	18		2.7634	3.0143	2.5793	2.801	2.7895
764	16.03	22.32	70.4	LE01Gene07630.t1	LE01Gene07630.t1	34		4.4571	4.7481	5.0275	5.3439	4.89415
774	15.75	16.45	77.9	LE01Gene08983.t1	LE01Gene08983.t1	30		1.9999	2.2184	2.2226	2.4567	2.2244
809	14.88	15.03	41	LE01Gene07889.t4	LE01Gene07889.t4	11		2.2992	2.4841	2.4213	2.5879	2.44813
817	14.8	16.63	70.2	LE01Gene09325.t1	LE01Gene09325.t1	20		3.0471	3.3973	2.946	3.3137	3.17603
838	14.46	14.62	48.8	LE01Gene10989.t1	LE01Gene10989.t1	14		2.7494	3.1864	2.9066	3.3604	3.0507
841	14.38	15.36	49.8	LE01Gene07629.t1	LE01Gene07629.t1	17		3.7722	3.97	4.0488	4.2829	4.01848
864	14.12	14.13	46.2	LE01Gene12239.t1	LE01Gene12239.t1	15		1.886	2.185	2.0234	2.3437	2.10953
881	14	14	30.3	LE01Gene07975.t1	LE01Gene07975.t1	9		2.396	2.6549	1.9731	2.1788	2.3007
884	13.92	14.03	29.7	LE01Gene13229.t1	LE01Gene13229.t1	14		2.1129	2.0595	1.969	1.9151	2.01412
932	13.09	15.52	40.5	LE01Gene00849.t1	LE01Gene00849.t1	11		0.4909	0.4362	0.5076	0.4497	0.4711
946	12.88	15.25	42.7	LE01Gene05116.t1	LE01Gene05116.t1	10		2.024	2.3326	2.0543	2.3619	2.1932
954	12.7	12.9	30.6	LE01Gene02589.t1	LE01Gene02589.t1	10		2.2128	2.2949	2.2515	2.3148	2.2685
990	12.1	14.16	20.9	LE01Gene00739.t1	LE01Gene00739.t1	9		2.7808	2.6004	3.2823	3.0176	2.92027
1014	12	12.02	19.7	LE01Gene01494.t1	LE01Gene01494.t1	9		1.9577	1.9014	2.3453	2.2616	2.1165
1021	11.9	12	54.8	LE01Gene04434.t2	LE01Gene04434.t2	7		2.8397	2.7572	2.8476	2.7141	2.78965
1035	11.75	11.84	29.8	LE01Gene06248.t1	LE01Gene06248.t1	10		2.0813	2.2606	2.5439	2.7443	2.40753
1082	10.78	10.83	49.6	LE01Gene05431.t1	LE01Gene05431.t1	8		0.457	0.4622	0.4508	0.4503	0.455075
1086	10.74	11.38	16.9	LE01Gene08225.t1	LE01Gene08225.t1	9		2.6555	3.0831	3.8871	4.4388	3.51612
1095	10.62	10.71	20.7	LE01Gene07715.t1	LE01Gene07715.t1	11		3.2421	2.4115	3.1703	2.3041	2.782
1104	10.48	10.54	40.3	LE01Gene07086.t1	LE01Gene07086.t1	19		2.1613	2.2923	2.1741	2.2984	2.23152
1137	10.16	10.26	35	LE01Gene11487.t1	LE01Gene11487.t1	12		2.9484	3.225	2.5914	2.8346	2.89985
1145	10.08	10.14	13.6	LE01Gene02639.t1	LE01Gene02639.t1	9		2.5373	2.9975	2.4424	2.946	2.7308
1161	10	10	20.7	LE01Gene04284.t1	LE01Gene04284.t1	9		2.2883	2.371	2.1508	2.2296	2.25992
1184	9.82	9.92	28.8	LE01Gene07758.t1	LE01Gene07758.t1	10		0.4098	0.4368	0.3821	0.406	0.408675
1229	9.24	9.44	54.8	LE01Gene10731.t2	LE01Gene10731.t2	5		4.8548	4.6452	3.4509	3.3068	4.06442
1262	8.83	8.98	50.5	LE01Gene03307.t1	LE01Gene03307.t1	11		4.7017	4.8785	4.9135	5.0843	4.8945
1271	8.71	8.78	47.2	LE01Gene03985.t1	LE01Gene03985.t1	12		3.1849	0.3692	8.7275	1.0092	3.3227
1298	8.41	8.54	23.5	LE01Gene01361.t2	LE01Gene01361.t2	9		3.2706	3.7193	2.2868	2.5863	2.96575
1303	8.35	8.67	21.4	LE01Gene11793.t1	LE01Gene11793.t1	8		2.2228	2.3125	2.2338	2.3427	2.27795
1314	8.2	10.26	17.4	LE01Gene13030.t1	LE01Gene13030.t1	8		2.1951	2.0819	1.9639	1.8589	2.02495
1318	8.16	8.18	25.3	LE01Gene04829.t1	LE01Gene04829.t1	12		2.3088	2.2156	2.0821	1.9978	2.15108
1342	8.04	8.05	50.5	LE01Gene05083.t1	LE01Gene05083.t1	24		2.0486	2.1348	1.839	1.9926	2.00375
1371	8	8.01	10.3	LE01Gene06300.t1	LE01Gene06300.t1	5		2.4899	2.8502	1.6708	1.9012	2.22802
1372	8	8	19.2	LE01Gene04165.t1	LE01Gene04165.t1	8		2.4354	2.2905	2.7377	2.5415	2.50127
1424	7.4	7.73	30.5	LE01Gene08769.t3	LE01Gene08769.t3	7		1.9913	2.0233	2.1098	2.1166	2.06025
1428	7.36	7.88	60.9	LE01Gene06721.t2	LE01Gene06721.t2	8		2.2211	2.579	2.3228	2.6906	2.45338
1455	7.11	7.36	38.1	LE01Gene02600.t1	LE01Gene02600.t1	4		0.3257	0.3722	0.391	0.443	0.382975
1464	7.03	7.18	33.3	LE01Gene12816.t1	LE01Gene12816.t1	8		1.9636	2.2335	2.3074	2.6179	2.2806
1478	6.84	6.95	12.5	LE01Gene01064.t1	LE01Gene01064.t1	7		2.0086	2.1727	1.8641	2.0138	2.0148
1483	6.76	6.95	54.3	LE01Gene02855.t1	LE01Gene02855.t1	4		2.8816	2.5755	1.9564	1.7442	2.28943
1485	6.74	6.97	27.3	LE01Gene08287.t1	LE01Gene08287.t1	5		2.7581	2.9579	2.9589	3.1646	2.95988
1529	6.3	6.4	13.8	LE01Gene08475.t1	LE01Gene08475.t1	4		2.6881	2.8604	3.3756	3.5787	3.1257
1560	6.07	6.11	21	LE01Gene11722.t2	LE01Gene11722.t2	4		1.7292	1.8867	2.4754	2.733	2.20608
1567	6.05	6.06	22.8	LE01Gene10050.t1	LE01Gene10050.t1	5		2.715	3.2758	1.9827	2.3639	2.58435
1571	6.04	6.44	12.4	LE01Gene00047.t2	LE01Gene00047.t2	9		2.599	2.9601	2.4929	2.8325	2.72113
1579	6.02	6.04	13.9	LE01Gene03870.t1	LE01Gene03870.t1	3		1.2013	1.4663	5.1259	5.9121	3.4264
1599	6	6.01	19.7	LE01Gene06423.t1	LE01Gene06423.t1	4		2.3485	1.9747	3.1942	2.7009	2.55457
1607	6	6	30.4	LE01Gene03818.t1	LE01Gene03818.t1	5		2.8789	3.2031	3.1879	3.5499	3.20495
1610	6	6	16.4	LE01Gene12644.t1	LE01Gene12644.t1	3		0.5782	0.4453	0.4831	0.377	0.4709
1618	6	6	14.9	LE01Gene06973.t2	LE01Gene06973.t2	13		3.2551	3.6431	3.3303	3.6853	3.47845
1621	6	6	37.3	LE01Gene05853.t1	LE01Gene05853.t1	4		2.5251	2.0033	2.1639	1.7162	2.10213
1730	4.97	5.12	43	LE01Gene11861.t1	LE01Gene11861.t1	15		2.5098	1.6342	5.3281	3.6153	3.27185
1737	4.85	5.71	26.6	LE01Gene04813.t2	LE01Gene04813.t2	6		2.3258	2.479	2.035	2.1662	2.2515
1756	4.72	4.8	12.7	LE01Gene09597.t1	LE01Gene09597.t1	3		1.205	1.1462	3.5058	3.3265	2.29588
1765	4.63	4.7	12.2	LE01Gene06657.t2	LE01Gene06657.t2	3		0.6576	0.2116	0.5579	0.1691	0.39905
1769	4.59	4.66	12.2	LE01Gene04633.t1	LE01Gene04633.t1	4		0.4258	0.4412	0.4524	0.4672	0.44665
1786	4.45	4.59	18.6	LE01Gene04641.t1	LE01Gene04641.t1	3		2.5841	2.1703	2.1271	1.7613	2.1607
1793	4.43	4.49	12.5	LE01Gene12252.t1	LE01Gene12252.t1	3		1.6785	2.0211	2.1983	2.6196	2.12938
1858	4.12	4.15	21	LE01Gene08614.t1	LE01Gene08614.t1	5		3.6057	3.0563	3.2581	2.7157	3.15895
1883	4.06	4.07	30.1	LE01Gene05216.t1	LE01Gene05216.t1	4		3.6254	4.9084	1.1081	1.4965	2.7846
1903	4.03	4.04	13.9	LE01Gene01684.t1	LE01Gene01684.t1	2		0.4164	0.3911	0.4381	0.4105	0.414025
1916	4.01	12.03	14.2	LE01Gene13992.t1	LE01Gene13992.t1	8		3.7059	1.7774	2.2819	1.0919	2.21428
1926	4.01	4.04	18.7	LE01Gene10340.t1	LE01Gene10340.t1	3		1.6806	1.9813	2.0124	2.3658	2.01003
1935	4.01	4.02	26.2	LE01Gene06413.t2	LE01Gene06413.t2	2		3.048	2.4983	2.4909	2.0339	2.51778
1942	4	8.43	21.1	LE01Gene08980.t1	LE01Gene08980.t1	6		0.5213	0.4816	0.4199	0.3824	0.4513
1948	4	4.96	34.8	LE01Gene07204.t1	LE01Gene07204.t1	5		0.6231	0.4807	0.4545	0.3511	0.47735
1949	4	4.84	9.2	LE01Gene00944.t3	LE01Gene00944.t3	3		0.4176	0.2003	0.4872	0.2331	0.33455
1958	4	4.18	17.2	LE01Gene13368.t2	LE01Gene13368.t2	7		3.3974	4.2176	3.0206	3.7404	3.594
1963	4	4.09	9.8	LE01Gene08749.t1	LE01Gene08749.t1	3		0.374	0.5097	0.4564	0.6205	0.49015
2002	4	4	9.9	LE01Gene06416.t1	LE01Gene06416.t1	3		4.7708	4.6361	5.091	4.9913	4.8723
2008	4	4	60.5	LE01Gene12503.t1	LE01Gene12503.t1	2		0.6408	0.3451	0.6098	0.3332	0.482225
2016	4	4	10.2	LE01Gene08330.t1	LE01Gene08330.t1	3		3.0643	2.8806	3.0737	2.8822	2.9752
2050	3.8	4.23	11.3	LE01Gene11039.t1	LE01Gene11039.t1	6		2.7493	2.518	3.5488	3.2422	3.01457
2068	3.68	3.85	15	LE01Gene11311.t2	LE01Gene11311.t2	3		2.5111	2.6693	2.0735	2.1987	2.36315
2117	3.35	3.67	15.2	LE01Gene03561.t1	LE01Gene03561.t1	2		1.5279	1.8869	6.3955	7.8783	4.42215
2138	3.21	4.81	23.6	LE01Gene10169.t1	LE01Gene10169.t1	4		1.9173	1.9123	2.3851	2.3664	2.14528
2170	2.98	3.2	24.9	LE01Gene01675.t1	LE01Gene01675.t1	2		0.3573	0.1396	0.6047	0.2357	0.334325
2175	2.95	3.12	46.6	LE01Gene05221.t1	LE01Gene05221.t1	5		1.8481	1.8814	2.1267	2.1597	2.00397
2178	2.91	3.11	49.7	LE01Gene04217.t1	LE01Gene04217.t1	22		30.5081	38.9638	28.3239	36.0837	33.4699
2184	2.84	3	8.1	LE01Gene02765.t1	LE01Gene02765.t1	2		0.4105	0.3571	0.4368	0.381	0.39635
2232	2.45	2.52	16.7	LE01Gene00247.t1	LE01Gene00247.t1	4		3.6362	1.9502	2.7818	1.4882	2.4641
2237	2.39	2.94	7.2	LE01Gene07684.t2	LE01Gene07684.t2	4		0.4897	0.5572	0.3676	0.4172	0.457925
2251	2.35	3.23	8.8	LE01Gene01096.t1	LE01Gene01096.t1	3		2.2356	2.5608	2.232	2.5568	2.3963
2257	2.34	2.4	11.2	LE01Gene00726.t1	LE01Gene00726.t1	4		2.1596	2.4835	2.5253	2.907	2.51885
2262	2.3	2.37	24.9	LE01Gene05588.t3	LE01Gene05588.t3	6		5.4691	4.5682	4.8962	4.0794	4.75323
2311	2.11	2.14	19.6	LE01Gene04243.t1	LE01Gene04243.t1	2		2.3065	2.4553	2.5082	2.6693	2.48482
2326	2.08	2.11	33.3	LE01Gene02980.t1	LE01Gene02980.t1	11		2.4628	2.5923	2.5869	2.7161	2.58953
2328	2.08	2.1	25	LE01Gene00097.t2	LE01Gene00097.t2	2		2.9806	4.9075	1.1388	1.8703	2.7243
2361	2.03	2.19	18.4	LE01Gene01478.t2	LE01Gene01478.t2	3		0.3754	0.4797	0.3924	0.4869	0.4336
2375	2.03	2.04	10.4	LE01Gene02688.t1	LE01Gene02688.t1	2		0.2725	0.2086	0.2529	0.1921	0.231525
2426	2.01	2.03	7.1	LE01Gene07167.t1	LE01Gene07167.t1	2		3.7364	3.1998	2.3773	2.0382	2.83793
2456	2.01	2.01	20.7	LE01Gene04546.t2	LE01Gene04546.t2	5		2.1353	2.4442	2.0994	2.3972	2.26903
2473	2	4.01	18.8	LE01Gene07894.t1	LE01Gene07894.t1	2		3.3043	2.9308	4.0714	3.6021	3.47715
2478	2	4	17.2	LE01Gene10166.t1	LE01Gene10166.t1	2		6.2619	7.9043	3.7004	4.6593	5.63148
2486	2	2.61	35.3	LE01Gene03955.t1	LE01Gene03955.t1	3		2.9243	2.9397	1.989	1.9945	2.46188
2501	2	2.08	19.6	LE01Gene13555.t1	LE01Gene13555.t1	2		1.0283	0.7398	4.2088	3.0205	2.24935
2511	2	2.06	22	LE01Gene13910.t1	LE01Gene13910.t1	2		0.4226	0.0335	0.4074	0.0322	0.223925
2521	2	2.04	18.7	LE01Gene00488.t1	LE01Gene00488.t1	3		0.01	1.1516	0.01	0.7583	0.482475
2540	2	2.02	12	LE01Gene12740.t2	LE01Gene12740.t2	2		3.9777	2.2439	3.4817	1.9592	2.91563
2547	2	2.02	19.2	LE01Gene12441.t1	LE01Gene12441.t1	3		2.9703	4.044	2.0404	2.771	2.95643
2582	2	2.01	7.2	LE01Gene04431.t1	LE01Gene04431.t1	2		0.4858	0.5272	0.3923	0.4218	0.456775
2594	2	2.01	4.4	LE01Gene06974.t1	LE01Gene06974.t1	2		0.3481	0.6119	0.3675	0.6444	0.492975
2605	2	2.01	8.9	LE01Gene05195.t1	LE01Gene05195.t1	2		2.1984	0.8412	4.5178	1.7243	2.32043
2627	2	2.01	12.2	LE01Gene10225.t1	LE01Gene10225.t1	3		2.5524	2.9135	2.5376	2.8894	2.72322
2650	2	2	9.5	LE01Gene09525.t1	LE01Gene09525.t1	2		0.2986	0.4731	4.0586	6.4137	2.811
2721	2	2	9.6	LE01Gene00313.t1	LE01Gene00313.t1	2		0.4968	0.343	0.5367	0.3696	0.436525
2809	1.86	2.01	17.9	LE01Gene12417.t1	LE01Gene12417.t1	2		1.7203	1.8847	2.1632	2.364	2.03305
2814	1.85	2.02	10.4	LE01Gene03829.t1	LE01Gene03829.t1	2		1.4195	1.4282	2.6263	2.6357	2.02743
2819	1.83	2.02	12.6	LE01Gene13397.t1	LE01Gene13397.t1	3		2.8112	3.2167	2.3133	2.6403	2.74538
2828	1.8	2	14.4	LE01Gene13515.t1	LE01Gene13515.t1	2		0.3737	0.6416	0.311	0.5327	0.46475
2860	1.52	2.24	10.5	LE01Gene11586.t2	LE01Gene11586.t2	3		2.3909	2.6107	2.1742	2.3681	2.38598
2874	1.42	1.75	10.3	LE01Gene04390.t5	LE01Gene04390.t5	2		0.827	7.9585	1.0294	9.8821	4.92425
2880	1.41	1.8	10.4	LE01Gene04205.t1	LE01Gene04205.t1	2		1.523	1.9402	2.3418	2.9758	2.1952
