# Supplementary material for: Oxidative Stress and Autophagy Are Important Processes in Post Ripeness and Brown Film Formation in Mycelium of Lentinula edodes
Source: Frontiers journal article supplement (doi:10.3389/fmicb.2022.811673), 2022-02-24
Supplement: Table_3.XLS [file Table_3.XLS]

## Sheet: Sheet1
	Table S3 The 239 differentially expressed proteins by Union analysis
N	Unused	Total	% Cov	Accession #	Name	Peptides(95%)	Species	115:113	116:113	115:114	116:114	2-1	117:113	118:113	117:114	118:114	3-1	119:113	121:113	119:114	121:114	4-1
1	129.12	129.12	95.1	LE01Gene04245.t1	LE01Gene04245.t1	497		2.3566	2.2814	2.6724	2.6006	2.47775	2.2184	1.811	2.5179	2.0653	2.15315	2.4923	2.752	2.8413	3.1242	2.80245
9	90.77	91.05	74.6	LE01Gene10868.t1	LE01Gene10868.t1	103		1.5512	1.5258	1.492	1.4792	1.51205	3.6095	3.0289	3.4793	2.9158	3.25838	6.6575	7.8603	6.5163	7.6663	7.1751
27	71.25	71.85	75.9	LE01Gene03252.t3	LE01Gene03252.t3	100		0.5376	0.5488	0.615	0.6323	0.583425	0.5108	0.4269	0.5872	0.4906	0.503875	0.4374	0.4758	0.5043	0.5484	0.491475
39	64.59	64.66	88.8	LE01Gene12649.t3	LE01Gene12649.t3	91		1.9107	1.9024	1.9931	1.995	1.9503	2.3439	2.0505	2.4476	2.1416	2.2459	2.0806	2.1423	2.1789	2.2371	2.15972
47	60.94	61.15	82.4	LE01Gene02536.t1	LE01Gene02536.t1	120		0.4031	0.4139	0.4836	0.5001	0.450175	0.4754	0.3928	0.5751	0.4729	0.47905	0.4465	0.5215	0.5419	0.6306	0.535125
49	60.74	61.67	93.9	LE01Gene04822.t1	LE01Gene04822.t1	62		1.7507	1.7182	1.7844	1.7575	1.7527	2.1445	2.0102	2.1795	2.0522	2.0966	2.2727	2.3	2.3364	2.3566	2.31642
52	58.68	58.74	97.5	LE01Gene08639.t1	LE01Gene08639.t1	134		1.7284	1.6718	1.8555	1.804	1.76493	2.3975	1.9148	2.5751	2.0624	2.23745	2.5042	3.0217	2.6961	3.241	2.86575
82	50.9	51.01	72.5	LE01Gene03297.t1	LE01Gene03297.t1	162		1.2831	1.2497	1.3107	1.2818	1.28132	2.3112	2.01	2.3557	2.0448	2.18043	2.4346	2.6891	2.4686	2.7116	2.57597
98	47.95	59.51	80.2	LE01Gene05169.t1	LE01Gene05169.t1	177		2.7054	2.5849	2.8494	2.7368	2.71913	4.1642	3.3673	4.3361	3.5234	3.84775	4.4818	5.2822	4.7005	5.5138	4.99457
101	47.45	49.44	59.4	LE01Gene02678.t2	LE01Gene02678.t2	64		0.4412	0.453	0.453	0.4691	0.454075	0.4529	0.4256	0.4675	0.4388	0.4462	0.467	0.4657	0.4839	0.4808	0.47435
108	46.14	46.16	81	LE01Gene12328.t1	LE01Gene12328.t1	73		2.4154	2.2594	2.418	2.2727	2.34137	1.7804	1.5347	1.7788	1.5375	1.65785	1.4069	1.5872	1.415	1.5929	1.5005
129	42.73	42.79	69	LE01Gene07950.t1	LE01Gene07950.t1	49		2.486	2.4488	2.622	2.5989	2.53892	2.9011	2.3885	3.0824	2.5433	2.72883	3.5761	4.0732	3.821	4.3416	3.95297
130	42.65	43.7	97.2	LE01Gene05312.t1	LE01Gene05312.t1	139		3.3877	3.2837	3.7031	3.6095	3.496	2.199	1.869	2.4596	2.0863	2.15347	2.5768	2.8933	2.8865	3.2367	2.89832
145	41.2	41.85	74.6	LE01Gene07632.t2	LE01Gene07632.t2	80		6.9387	6.6056	6.637	6.3795	6.6402	5.4306	4.9317	5.3194	4.8455	5.1318	3.2901	3.4061	3.2414	3.3341	3.31792
165	38.62	39.01	62.2	LE01Gene06132.t1	LE01Gene06132.t1	41		0.3666	0.363	0.4066	0.4066	0.3857	0.5234	0.4655	0.5852	0.5181	0.52305	0.371	0.3611	0.4139	0.4045	0.387625
169	38.28	38.46	75.5	LE01Gene05031.t1	LE01Gene05031.t1	41		0.4186	0.429	0.4547	0.4696	0.442975	0.4609	0.4362	0.5021	0.4745	0.468425	0.5986	0.6279	0.6561	0.6868	0.64235
185	36.91	63.88	82	LE01Gene12649.t4	LE01Gene12649.t4	76		1.944	1.8983	2.1021	2.0642	2.00215	2.2314	1.9036	2.416	2.0567	2.15193	1.8091	1.865	1.9696	2.0291	1.9182
192	35.86	39.78	69.9	LE01Gene04040.t1	LE01Gene04040.t1	31		0.4384	0.4647	0.4537	0.4824	0.4598	0.4527	0.4528	0.4677	0.4669	0.460025	0.4061	0.4432	0.4215	0.4588	0.4324
194	35.65	36.25	81.4	LE01Gene05307.t1	LE01Gene05307.t1	57		2.1563	2.1562	1.9549	1.9668	2.05855	2.0197	1.6675	1.8525	1.5291	1.7672	1.3045	1.1679	1.2006	1.0882	1.1903
195	35.56	40.19	70	LE01Gene06191.t2	LE01Gene06191.t2	43		2.1697	2.1207	2.3002	2.2569	2.21188	2.337	2.1032	2.4919	2.2457	2.29445	2.1746	2.2692	2.3234	2.4231	2.29757
197	35.52	35.62	65.6	LE01Gene05149.t1	LE01Gene05149.t1	23		0.5223	0.5341	0.5329	0.549	0.534575	0.4286	0.4596	0.4372	0.4669	0.448075	0.4673	0.5048	0.479	0.518	0.492275
230	33.29	33.32	66.1	LE01Gene10519.t2	LE01Gene10519.t2	32		1.437	1.458	1.5917	1.6226	1.52733	1.7144	1.5123	1.8971	1.6772	1.70025	2.0474	1.9432	2.2742	2.1593	2.10602
274	31.24	31.3	85.2	LE01Gene10767.t1	LE01Gene10767.t1	66		1.3925	1.3509	1.5575	1.5229	1.45595	1.4154	1.1719	1.6079	1.3299	1.38128	1.714	2.0407	1.9508	2.3153	2.0052
317	29.19	29.54	49.3	LE01Gene06019.t1	LE01Gene06019.t1	30		1.9406	1.9506	1.6724	1.6872	1.8127	2.0566	1.9559	1.7654	1.6947	1.86815	2.3561	2.4713	2.0374	2.1271	2.24797
320	29.05	31.16	55.2	LE01Gene01588.t1	LE01Gene01588.t1	26		2.1734	2.1932	2.3814	2.4155	2.29088	1.7984	1.6114	1.9788	1.7721	1.79017	1.5551	1.7167	1.7152	1.8908	1.71945
324	28.83	30.24	42.5	LE01Gene05313.t1	LE01Gene05313.t1	42		1.4632	1.3833	1.5346	1.4617	1.4607	1.7552	1.4267	1.833	1.4951	1.6275	1.876	2.1069	1.9744	2.2056	2.04073
333	28.45	34.85	58.8	LE01Gene06989.t2	LE01Gene06989.t2	39		2.397	2.2598	1.8427	1.747	2.06162	2.2552	2.1263	1.7397	1.6458	1.94175	2.2911	2.3284	1.7694	1.8048	2.04842
341	28.13	28.18	24.8	LE01Gene07574.t2	LE01Gene07574.t2	18		2.3096	2.2429	2.0617	2.0101	2.15607	1.4174	1.4533	1.2725	1.3079	1.36278	1.1809	1.2275	1.0697	1.1119	1.1475
343	28.05	30.27	55.8	LE01Gene09434.t1	LE01Gene09434.t1	18		0.58	0.5697	0.6013	0.5945	0.586375	0.5106	0.5153	0.531	0.534	0.522725	0.4758	0.4502	0.4964	0.4725	0.473725
348	27.73	28.01	48.9	LE01Gene06588.t1	LE01Gene06588.t1	17		1.3833	1.4334	1.4681	1.5279	1.45317	1.6726	1.4407	1.7498	1.5278	1.59773	1.942	2.1994	2.0756	2.3331	2.13753
357	27.39	27.5	43.1	LE01Gene13788.t1	LE01Gene13788.t1	84		9.2986	9.0062	8.6922	8.4572	8.86355	6.2671	5.4589	6.3677	5.3921	5.87145	5.5492	5.8681	5.5371	5.5949	5.63732
370	26.66	27.47	33.1	LE01Gene05622.t1	LE01Gene05622.t1	55		5.0921	5.0749	5.9135	5.9281	5.50215	3.3873	2.7807	3.9666	3.2663	3.35023	2.2933	2.053	2.7013	2.4128	2.3651
382	26.24	26.36	72	LE01Gene11683.t1	LE01Gene11683.t1	27		1.5053	1.5187	1.6559	1.6852	1.59127	1.7087	1.4856	1.8809	1.6326	1.67695	2.2898	2.5535	2.5384	2.8336	2.55383
425	25.02	27.3	17.3	LE01Gene12913.t1	LE01Gene12913.t1	27		2.4356	2.3866	2.3271	2.2909	2.36005	1.8749	1.6386	1.8006	1.5743	1.7221	2.0338	2.0613	1.9576	1.9821	2.0087
446	24.01	26.49	68.7	LE01Gene00018.t1	LE01Gene00018.t1	30		2.3006	2.2448	2.3996	2.3558	2.3252	1.7496	1.4644	1.848	1.5461	1.65203	1.8874	2.2274	2.0007	2.3572	2.11817
454	23.89	23.93	24.8	LE01Gene04793.t1	LE01Gene04793.t1	24		2.2211	2.1972	2.0565	2.0501	2.13123	1.0603	1.1475	1.0032	1.0817	1.07317	0.8961	0.8817	0.8526	0.8444	0.8687
464	23.54	23.64	57.7	LE01Gene09888.t2	LE01Gene09888.t2	17		1.4527	1.425	1.5662	1.546	1.49748	1.7671	1.5866	1.9092	1.7131	1.744	1.9829	2.2251	2.1541	2.4133	2.19385
479	23.06	23.59	36.2	LE01Gene07717.t1	LE01Gene07717.t1	18		1.4533	1.5112	1.5234	1.5804	1.51707	1.5816	1.4	1.6483	1.4754	1.52632	1.9368	2.1808	2.0338	2.2642	2.1039
489	22.62	24.09	47.1	LE01Gene02211.t1	LE01Gene02211.t1	23		0.455	0.5172	0.4783	0.5489	0.49985	0.5088	0.4781	0.5389	0.5071	0.508225	0.3697	0.4025	0.3926	0.4266	0.39785
497	22.43	22.6	34.8	LE01Gene02092.t1	LE01Gene02092.t1	36		4.7526	4.5383	4.5141	4.3374	4.5356	5.0257	4.3767	4.7609	4.1393	4.57565	3.4042	3.262	3.245	3.1612	3.2681
511	21.94	24.07	91.3	LE01Gene11226.t1	LE01Gene11226.t1	57		0.1581	0.1767	0.18	0.2034	0.17955	0.2029	0.1633	0.2332	0.1881	0.196875	0.1647	0.1824	0.1903	0.2098	0.1868
533	21.25	23.62	80.8	LE01Gene02680.t1	LE01Gene02680.t1	21		0.1781	0.1948	0.2012	0.2223	0.1991	0.1609	0.1495	0.1823	0.1677	0.1651	0.1269	0.1537	0.1432	0.1713	0.148775
538	21.14	21.17	34.9	LE01Gene04737.t1	LE01Gene04737.t1	29		2.2068	2.2428	1.8677	1.8974	2.05368	1.4504	1.5322	1.2242	1.2927	1.37487	1.8555	1.976	1.5687	1.6753	1.76887
568	20.47	28.29	67.6	LE01Gene12309.t3	LE01Gene12309.t3	29		4.6148	4.5162	3.859	3.781	4.19275	1.8894	1.7892	1.673	1.5842	1.73395	1.8626	1.9191	1.6341	1.6995	1.77882
582	20.12	20.16	93.8	LE01Gene12197.t1	LE01Gene12197.t1	44		0.491	0.5031	0.5526	0.5703	0.52925	0.4883	0.3985	0.5508	0.4497	0.471825	0.5246	0.5793	0.5944	0.6569	0.5888
622	19.13	19.19	89.7	LE01Gene05314.t1	LE01Gene05314.t1	20		1.9745	1.8408	1.8607	1.7443	1.85508	2.7149	2.4387	2.57	2.3076	2.5078	2.5536	2.7199	2.4239	2.5758	2.5683
649	18.73	18.91	17.7	LE01Gene05655.t1	LE01Gene05655.t1	10		1.4786	1.3985	1.4692	1.3919	1.43455	1.9101	1.6094	1.8814	1.5871	1.747	2.0501	2.1163	2.0098	2.0659	2.06053
666	18.19	19.16	47.8	LE01Gene12747.t1	LE01Gene12747.t1	19		3.6655	3.3037	3.2962	2.982	3.31185	1.8725	1.709	1.7089	1.5503	1.71018	1.4609	1.4881	1.3315	1.3621	1.41065
669	18.11	18.22	25.8	LE01Gene11488.t1	LE01Gene11488.t1	11		1.3316	1.2271	1.333	1.2324	1.28103	1.5547	1.3884	1.5552	1.3899	1.47205	1.972	2.1362	1.9701	2.1315	2.05245
670	18.11	18.11	32.3	LE01Gene07614.t1	LE01Gene07614.t1	17		1.6067	1.755	1.8038	1.9696	1.78377	2.4387	2.1875	2.6899	2.4425	2.43965	3.049	3.3759	3.3177	3.6545	3.34928
678	18	18.01	51.3	LE01Gene04862.t1	LE01Gene04862.t1	11		0.5542	0.5408	0.5765	0.5659	0.55935	0.5964	0.5943	0.6198	0.614	0.606125	0.4766	0.4242	0.4977	0.4417	0.46005
686	17.87	17.97	31.9	LE01Gene02701.t2	LE01Gene02701.t2	12		3.6704	3.3533	2.6515	2.3403	3.00387	5.0365	3.9969	3.4545	2.8992	3.84678	6.0871	7.2207	4.1813	4.9294	5.60463
694	17.57	19.86	25.6	LE01Gene07165.t3	LE01Gene07165.t3	9		0.5757	0.6441	0.5753	0.6526	0.611925	0.5947	0.5832	0.5998	0.5853	0.59075	0.4874	0.4956	0.4907	0.502	0.493925
704	17.3	17.35	31.6	LE01Gene08997.t3	LE01Gene08997.t3	9		2.7706	2.7076	2.6495	2.6144	2.68552	1.8426	1.8584	1.8004	1.8084	1.82745	1.257	1.309	1.2413	1.2877	1.27375
713	17.06	17.12	70.5	LE01Gene02631.t1	LE01Gene02631.t1	45		2.4951	2.4558	2.3296	2.3073	2.39695	3.0044	2.9806	2.8165	2.7973	2.8997	3.7727	4.1977	3.5691	3.9657	3.8763
722	16.86	16.98	71.8	LE01Gene05328.t1	LE01Gene05328.t1	17		2.0714	2.005	2.2576	2.1983	2.13307	2.3722	1.9928	2.5601	2.1511	2.26905	2.4042	2.4312	2.6071	2.6383	2.5202
726	16.74	16.81	82.5	LE01Gene10170.t1	LE01Gene10170.t1	10		0.3441	0.3652	0.3785	0.4044	0.37305	0.4232	0.4438	0.4653	0.4856	0.454475	0.3575	0.3834	0.3948	0.428	0.390925
738	16.45	16.57	38.3	LE01Gene01844.t1	LE01Gene01844.t1	24		2.4464	2.3015	2.6503	2.4932	2.47285	1.7796	1.6111	1.9398	1.7538	1.77107	1.9406	2.0408	2.119	2.2254	2.08145
745	16.37	16.51	56.1	LE01Gene06514.t1	LE01Gene06514.t1	18		2.2132	1.8881	2.0683	1.7738	1.98585	2.5801	2.3361	2.4049	2.1784	2.37487	2.7634	3.0143	2.5793	2.801	2.7895
763	16.06	16.18	34.5	LE01Gene04089.t3	LE01Gene04089.t3	16		2.2369	2.0651	2.0915	1.9461	2.0849	2.4658	2.1061	2.3134	1.9742	2.21488	1.2925	1.1406	1.2102	1.0671	1.1776
764	16.03	22.32	70.4	LE01Gene07630.t1	LE01Gene07630.t1	34		5.379	5.1134	5.943	5.6849	5.53008	5.5138	4.9171	6.1151	5.4787	5.50617	4.4571	4.7481	5.0275	5.3439	4.89415
774	15.75	16.45	77.9	LE01Gene08983.t1	LE01Gene08983.t1	30		1.9088	1.8593	2.1101	2.0648	1.98575	1.8368	1.5728	2.0351	1.7453	1.7975	1.9999	2.2184	2.2226	2.4567	2.2244
809	14.88	15.03	41	LE01Gene07889.t4	LE01Gene07889.t4	11		1.5021	1.4903	1.5625	1.563	1.52947	1.9639	1.7657	2.0539	1.8477	1.9078	2.2992	2.4841	2.4213	2.5879	2.44813
817	14.8	16.63	70.2	LE01Gene09325.t1	LE01Gene09325.t1	20		2.5627	2.7038	2.4823	2.6212	2.5925	2.7949	2.7458	2.6926	2.6481	2.72035	3.0471	3.3973	2.946	3.3137	3.17603
838	14.46	14.62	48.8	LE01Gene10989.t1	LE01Gene10989.t1	14		1.203	1.1177	1.2647	1.1824	1.19195	1.8006	1.5281	1.895	1.6089	1.70815	2.7494	3.1864	2.9066	3.3604	3.0507
841	14.38	15.36	49.8	LE01Gene07629.t1	LE01Gene07629.t1	17		4.0786	4.1163	4.2997	4.3324	4.20675	4.5978	3.7772	4.896	4.0057	4.31918	3.7722	3.97	4.0488	4.2829	4.01848
852	14.27	14.29	22.5	LE01Gene06046.t2	LE01Gene06046.t2	9		2.7498	2.5489	2.7269	2.5442	2.64245	2.5783	2.3724	2.5372	2.3329	2.4552	1.822	1.7583	1.7935	1.7341	1.77697
864	14.12	14.13	46.2	LE01Gene12239.t1	LE01Gene12239.t1	15		1.3532	1.3755	1.4485	1.491	1.41705	1.4672	1.3307	1.5556	1.4028	1.43908	1.886	2.185	2.0234	2.3437	2.10953
880	14	14	32.4	LE01Gene08460.t1	LE01Gene08460.t1	10		2.6749	2.5787	2.588	2.5109	2.58813	2.1521	2.0214	2.0839	1.9475	2.05123	1.8624	2.0842	1.8203	2.02	1.94672
881	14	14	30.3	LE01Gene07975.t1	LE01Gene07975.t1	9		3.3354	3.3154	2.7344	2.7386	3.03095	4.1487	3.6192	3.4114	2.9598	3.53477	2.396	2.6549	1.9731	2.1788	2.3007
884	13.92	14.03	29.7	LE01Gene13229.t1	LE01Gene13229.t1	14		1.6676	1.6766	1.5384	1.5613	1.61098	1.8984	1.7887	1.7509	1.6557	1.77343	2.1129	2.0595	1.969	1.9151	2.01412
895	13.75	14.01	20.6	LE01Gene13055.t1	LE01Gene13055.t1	21		2.0251	1.8877	2.1061	1.9897	2.00215	1.6044	1.5478	1.6643	1.5924	1.60222	1.4553	1.4864	1.5053	1.6048	1.51295
932	13.09	15.52	40.5	LE01Gene00849.t1	LE01Gene00849.t1	11		0.47	0.4892	0.4825	0.5038	0.486375	0.4657	0.4518	0.4802	0.4635	0.4653	0.4909	0.4362	0.5076	0.4497	0.4711
946	12.88	15.25	42.7	LE01Gene05116.t1	LE01Gene05116.t1	10		1.7615	1.8799	1.7793	1.9112	1.83298	1.7662	1.5289	1.7853	1.5466	1.65675	2.024	2.3326	2.0543	2.3619	2.1932
954	12.7	12.9	30.6	LE01Gene02589.t1	LE01Gene02589.t1	10		1.7192	1.5879	1.7453	1.624	1.6691	2.31	2.0485	2.3563	2.0748	2.1974	2.2128	2.2949	2.2515	2.3148	2.2685
956	12.68	12.84	27.1	LE01Gene13266.t1	LE01Gene13266.t1	11		2.1824	2.1592	2.0006	2.0281	2.09258	1.181	1.1824	1.1356	1.1402	1.1598	1.0573	0.9799	1.016	0.9366	0.99745
978	12.27	12.34	36.4	LE01Gene03223.t1	LE01Gene03223.t1	13		3.1933	3.2624	2.6286	2.6831	2.94185	3.1378	2.7649	2.5876	2.2728	2.69077	1.8778	1.7754	1.5538	1.4583	1.66633
990	12.1	14.16	20.9	LE01Gene00739.t1	LE01Gene00739.t1	9		5.0618	4.9832	5.9469	5.8895	5.47035	3.2419	3.2631	3.7933	3.819	3.52933	2.7808	2.6004	3.2823	3.0176	2.92027
1006	12.03	12.03	39.6	LE01Gene04946.t1	LE01Gene04946.t1	19		3.0877	3.1458	3.3144	3.3867	3.23365	2.0882	1.9949	2.2422	2.1497	2.11875	1.2996	1.1003	1.4162	1.1919	1.252
1009	12.02	12.02	23.6	LE01Gene12184.t1	LE01Gene12184.t1	10		2.1567	2.002	2.2081	2.0603	2.10677	2.1734	1.9781	2.2268	2.0265	2.1012	1.7431	1.6879	1.7909	1.7286	1.73762
1014	12	12.02	19.7	LE01Gene01494.t1	LE01Gene01494.t1	9		1.4343	1.4698	1.6866	1.7426	1.58332	1.2803	1.2486	1.5308	1.4949	1.38865	1.9577	1.9014	2.3453	2.2616	2.1165
1015	12	12.01	22.8	LE01Gene05323.t1	LE01Gene05323.t1	10		2.9495	2.9173	2.3421	2.3073	2.62905	1.6483	1.9461	1.3059	1.5457	1.6115	1.5135	1.4104	1.2002	1.1132	1.30933
1021	11.9	12	54.8	LE01Gene04434.t2	LE01Gene04434.t2	7		1.8708	1.7473	1.8845	1.7658	1.8171	2.0475	2.0032	2.0502	2.022	2.03072	2.8397	2.7572	2.8476	2.7141	2.78965
1035	11.75	11.84	29.8	LE01Gene06248.t1	LE01Gene06248.t1	10		1.3037	1.2583	1.5757	1.5253	1.41575	1.9298	1.5255	2.3256	1.8573	1.90955	2.0813	2.2606	2.5439	2.7443	2.40753
1067	11.15	11.24	38.8	LE01Gene06016.t1	LE01Gene06016.t1	14		2.3162	2.2831	2.3273	2.3138	2.3101	2.157	2.0958	2.17	2.099	2.13045	1.3502	1.3524	1.364	1.3666	1.3583
1082	10.78	10.83	49.6	LE01Gene05431.t1	LE01Gene05431.t1	8		0.6659	0.7376	0.6527	0.7281	0.696075	0.5482	0.5965	0.5386	0.5862	0.567375	0.457	0.4622	0.4508	0.4503	0.455075
1086	10.74	11.38	16.9	LE01Gene08225.t1	LE01Gene08225.t1	9		2.2769	2.1694	3.3116	3.1729	2.7327	2.3526	1.8343	3.4274	2.6668	2.57028	2.6555	3.0831	3.8871	4.4388	3.51612
1095	10.62	10.71	20.7	LE01Gene07715.t1	LE01Gene07715.t1	11		4.6613	4.4277	4.5458	4.3393	4.49352	2.8745	2.8671	2.7985	2.7929	2.83325	3.2421	2.4115	3.1703	2.3041	2.782
1104	10.48	10.54	40.3	LE01Gene07086.t1	LE01Gene07086.t1	19		2.4337	2.1084	2.4169	2.1067	2.26642	2.5839	2.3837	2.5714	2.3664	2.47635	2.1613	2.2923	2.1741	2.2984	2.23152
1137	10.16	10.26	35	LE01Gene11487.t1	LE01Gene11487.t1	12		2.025	2.003	1.782	1.7682	1.89455	2.5889	2.4016	2.2782	2.117	2.34642	2.9484	3.225	2.5914	2.8346	2.89985
1145	10.08	10.14	13.6	LE01Gene02639.t1	LE01Gene02639.t1	9		1.7796	1.5116	1.7064	1.3877	1.59632	2.1267	1.6127	2.0418	1.5036	1.8212	2.5373	2.9975	2.4424	2.946	2.7308
1148	10.05	10.18	13.7	LE01Gene07138.t1	LE01Gene07138.t1	8		0.4044	0.447	0.4322	0.4794	0.44075	0.4726	0.4983	0.507	0.533	0.502725	0.6195	0.675	0.6669	0.7257	0.671775
1151	10.03	10.11	10	LE01Gene04058.t1	LE01Gene04058.t1	6		2.519	2.6856	1.935	2.1084	2.312	2.075	2.1863	1.6704	1.7607	1.9231	1.8716	2.5431	1.529	2.0502	1.99848
1161	10	10	20.7	LE01Gene04284.t1	LE01Gene04284.t1	9		2.2534	2.2867	2.1276	2.2165	2.22105	2.4198	2.2967	2.2954	2.2108	2.30567	2.2883	2.371	2.1508	2.2296	2.25992
1184	9.82	9.92	28.8	LE01Gene07758.t1	LE01Gene07758.t1	10		0.5159	0.5947	0.4833	0.5631	0.53925	0.5818	0.4133	0.5451	0.3899	0.482525	0.4098	0.4368	0.3821	0.406	0.408675
1201	9.58	9.66	22.4	LE01Gene06415.t1	LE01Gene06415.t1	7		2.8155	2.7529	2.8349	2.7912	2.79863	1.9835	1.9743	1.9951	1.9923	1.9863	2.0581	1.8858	2.0818	1.9096	1.98383
1229	9.24	9.44	54.8	LE01Gene10731.t2	LE01Gene10731.t2	5		3.3331	2.7899	2.3871	2.0243	2.6336	2.6617	2.5601	1.9112	1.8349	2.24198	4.8548	4.6452	3.4509	3.3068	4.06442
1262	8.83	8.98	50.5	LE01Gene03307.t1	LE01Gene03307.t1	11		1.5923	1.5164	1.6541	1.5839	1.58667	1.2707	1.13	1.3198	1.1754	1.22397	4.7017	4.8785	4.9135	5.0843	4.8945
1265	8.8	8.9	19.7	LE01Gene06426.t1	LE01Gene06426.t1	6		2.0732	2.0127	2.4247	2.3657	2.21908	1.2684	1.2169	1.4753	1.4254	1.3465	1.5824	1.7588	1.8619	2.0668	1.81747
1271	8.71	8.78	47.2	LE01Gene03985.t1	LE01Gene03985.t1	12		2.5035	3.1158	6.8255	8.5465	5.24783	0.8122	1.8872	2.2154	5.1504	2.5163	3.1849	0.3692	8.7275	1.0092	3.3227
1298	8.41	8.54	23.5	LE01Gene01361.t2	LE01Gene01361.t2	9		1.4908	1.4139	1.0538	0.9935	1.238	1.4159	1.4165	0.9806	0.9868	1.19995	3.2706	3.7193	2.2868	2.5863	2.96575
1303	8.35	8.67	21.4	LE01Gene11793.t1	LE01Gene11793.t1	8		4.527	4.388	4.4458	4.3506	4.42785	2.4246	2.4946	2.3964	2.4801	2.44893	2.2228	2.3125	2.2338	2.3427	2.27795
1314	8.2	10.26	17.4	LE01Gene13030.t1	LE01Gene13030.t1	8		1.7332	1.7609	1.5616	1.5814	1.65928	2.1768	2.0336	1.9332	1.8056	1.9873	2.1951	2.0819	1.9639	1.8589	2.02495
1315	8.2	8.23	25.2	LE01Gene09622.t1	LE01Gene09622.t1	6		2.3963	2.1699	2.4594	2.2373	2.31573	1.6283	1.701	1.6716	1.7453	1.68655	1.9917	1.8902	2.0529	1.9441	1.96972
1318	8.16	8.18	25.3	LE01Gene04829.t1	LE01Gene04829.t1	12		2.9977	3.0673	2.688	2.7619	2.87873	4.4495	3.7463	3.9749	3.355	3.88143	2.3088	2.2156	2.0821	1.9978	2.15108
1331	8.09	8.11	72.6	LE01Gene00278.t1	LE01Gene00278.t1	6		0.4686	0.4637	0.5672	0.5651	0.51615	0.4187	0.4415	0.5071	0.5325	0.47495	0.5348	0.5143	0.6505	0.6246	0.58105
1342	8.04	8.05	50.5	LE01Gene05083.t1	LE01Gene05083.t1	24		4.4582	4.6186	3.889	4.0836	4.26235	2.365	1.9804	2.1588	1.7472	2.06285	2.0486	2.1348	1.839	1.9926	2.00375
1366	8	8.07	23.2	LE01Gene05418.t2	LE01Gene05418.t2	27		3.5903	3.5302	3.6908	3.6241	3.60885	2.2897	1.8622	2.356	1.9058	2.10342	1.6435	1.4301	1.7208	1.4857	1.57002
1368	8	8.02	11.3	LE01Gene04347.t1	LE01Gene04347.t1	35		4.5883	4.3062	4.5801	4.3141	4.44717	1.7649	1.6712	1.788	1.6918	1.72897	1.144	1.1826	1.1665	1.2039	1.17425
1371	8	8.01	10.3	LE01Gene06300.t1	LE01Gene06300.t1	5		3.3762	2.8186	2.2307	1.8886	2.57852	2.8881	2.6161	1.9075	1.7192	2.28273	2.4899	2.8502	1.6708	1.9012	2.22802
1372	8	8	19.2	LE01Gene04165.t1	LE01Gene04165.t1	8		1.6783	1.8793	1.8631	2.1304	1.88777	2.6291	2.2016	2.9444	2.4607	2.55895	2.4354	2.2905	2.7377	2.5415	2.50127
1390	7.84	8.19	20.7	LE01Gene12866.t1	LE01Gene12866.t1	8		1.9879	1.9465	2.1079	2.106	2.03707	1.2698	1.7063	1.3642	1.8266	1.54173	1.1872	1.2963	1.2908	1.178	1.23808
1391	7.83	8.1	16.4	LE01Gene10302.t1	LE01Gene10302.t1	8		3.4579	2.8659	2.97	2.4623	2.93902	1.8564	2.5145	1.605	2.1685	2.0361	1.706	1.5215	1.4796	1.3104	1.50438
1424	7.4	7.73	30.5	LE01Gene08769.t3	LE01Gene08769.t3	7		1.218	1.2135	1.2878	1.2933	1.25315	1.8533	1.7352	1.9448	1.822	1.83882	1.9913	2.0233	2.1098	2.1166	2.06025
1428	7.36	7.88	60.9	LE01Gene06721.t2	LE01Gene06721.t2	8		1.0908	1.1782	1.1325	1.2299	1.15785	1.3414	1.3941	1.3929	1.4482	1.39415	2.2211	2.579	2.3228	2.6906	2.45338
1438	7.24	10.55	27.3	LE01Gene12738.t1	LE01Gene12738.t1	7		1.4883	0.7435	2.2146	1.2313	1.41942	2.8456	0.8342	3.1119	1.3876	2.04483	1.0173	0.9366	1.6349	1.6004	1.2973
1455	7.11	7.36	38.1	LE01Gene02600.t1	LE01Gene02600.t1	4		0.3205	0.302	0.3804	0.361	0.340975	0.3361	0.3279	0.4019	0.3924	0.364575	0.3257	0.3722	0.391	0.443	0.382975
1464	7.03	7.18	33.3	LE01Gene12816.t1	LE01Gene12816.t1	8		5.9415	5.9691	6.9461	7.0208	6.46938	3.3163	2.6111	3.8788	3.0557	3.21548	1.9636	2.2335	2.3074	2.6179	2.2806
1478	6.84	6.95	12.5	LE01Gene01064.t1	LE01Gene01064.t1	7		2.0685	1.7722	1.9094	1.6468	1.84922	1.9451	1.7577	1.7967	1.6159	1.77885	2.0086	2.1727	1.8641	2.0138	2.0148
1483	6.76	6.95	54.3	LE01Gene02855.t1	LE01Gene02855.t1	4		1.2276	1.9249	0.8292	1.3082	1.32248	1.6615	1.2427	1.1228	0.8403	1.21683	2.8816	2.5755	1.9564	1.7442	2.28943
1485	6.74	6.97	27.3	LE01Gene08287.t1	LE01Gene08287.t1	5		1.5852	1.4075	1.6962	1.5129	1.55045	2.8342	2.751	2.9951	2.9538	2.88353	2.7581	2.9579	2.9589	3.1646	2.95988
1489	6.71	6.89	16.7	LE01Gene01882.t1	LE01Gene01882.t1	4		1.89	1.8135	2.086	2.0148	1.95108	2.0186	1.9075	2.2346	2.1072	2.06698	2.0489	1.6421	2.2863	1.8093	1.94665
1505	6.5	6.54	19	LE01Gene07443.t1	LE01Gene07443.t1	5		2.6091	2.2917	1.9743	1.7208	2.14898	1.6894	1.737	1.282	1.3259	1.50857	1.6294	1.4893	1.2514	1.1006	1.36767
1516	6.39	6.45	24	LE01Gene14017.t1	LE01Gene14017.t1	20		2.757	2.4891	1.8153	1.6489	2.17758	2.5928	2.3114	1.708	1.5235	2.03392	1.2888	1.3817	0.853	0.9121	1.1089
1526	6.31	6.43	21.2	LE01Gene06725.t3	LE01Gene06725.t3	5		2.0476	2.1438	2.91	3.108	2.55235	0.9058	0.8859	1.3134	1.2715	1.09415	0.8941	0.7	1.3039	1.0192	0.9793
1529	6.3	6.4	13.8	LE01Gene08475.t1	LE01Gene08475.t1	4		1.467	1.8978	1.837	2.3921	1.89847	2.5764	2.8651	3.2237	3.5866	3.06295	2.6881	2.8604	3.3756	3.5787	3.1257
1542	6.21	6.3	20.7	LE01Gene02588.t1	LE01Gene02588.t1	4		0.4473	0.5329	0.4357	0.5175	0.48335	0.4985	0.6571	0.4819	0.6336	0.567775	0.5087	0.5942	0.4934	0.5749	0.5428
1552	6.13	6.15	10.5	LE01Gene07031.t1	LE01Gene07031.t1	4		2.2447	2.3138	2.2821	2.3598	2.3001	1.4464	1.2938	1.4674	1.3119	1.37987	1.4869	1.0265	1.5112	1.0444	1.26725
1560	6.07	6.11	21	LE01Gene11722.t2	LE01Gene11722.t2	4		1.8617	1.796	2.6861	2.6105	2.23857	1.388	1.6087	1.9869	2.3129	1.82412	1.7292	1.8867	2.4754	2.733	2.20608
1567	6.05	6.06	22.8	LE01Gene10050.t1	LE01Gene10050.t1	5		3.796	3.701	2.7676	2.7303	3.24872	5.1493	3.9079	3.772	2.9258	3.93875	2.715	3.2758	1.9827	2.3639	2.58435
1570	6.04	6.57	42.3	LE01Gene04051.t1	LE01Gene04051.t1	6		2.0269	1.73	3.342	2.8697	2.49215	1.6338	1.3416	2.695	2.2143	1.97117	1.3806	1.4056	2.288	2.3236	1.84945
1571	6.04	6.44	12.4	LE01Gene00047.t2	LE01Gene00047.t2	9		2.1384	1.9878	2.0378	1.906	2.0175	2.4862	2.2661	2.3707	2.1649	2.32197	2.599	2.9601	2.4929	2.8325	2.72113
1579	6.02	6.04	13.9	LE01Gene03870.t1	LE01Gene03870.t1	3		2.1224	1.9926	9.0859	8.7048	5.47643	1.2552	1.7117	5.3007	7.1495	3.85427	1.2013	1.4663	5.1259	5.9121	3.4264
1584	6.01	6.06	19.7	LE01Gene08044.t1	LE01Gene08044.t1	5		3.9358	4.1331	2.8931	3.0588	3.5052	1.5978	1.8786	1.1705	1.3648	1.50293	1.7476	2.1473	1.2748	1.5668	1.68412
1586	6.01	6.01	10.5	LE01Gene07273.t1	LE01Gene07273.t1	5		1.7613	1.6256	1.7326	1.6145	1.6835	1.9989	2.0465	1.9791	2.0355	2.015	1.0339	1.0469	1.0118	1.0262	1.0297
1590	6	8.01	24	LE01Gene08997.t5	LE01Gene08997.t5	6		1.7677	2.9824	1.3603	2.3089	2.10482	1.6679	1.8129	1.284	1.3965	1.54033	1.6107	2.8292	1.2458	2.1827	1.9671
1593	6	6.39	17.7	LE01Gene02763.t1	LE01Gene02763.t1	5		2.2288	2.1917	1.8933	1.8722	2.0465	1.2915	1.2909	1.0962	1.0961	1.19368	1.339	1.2062	1.1412	1.0293	1.17893
1599	6	6.01	19.7	LE01Gene06423.t1	LE01Gene06423.t1	4		3.1782	3.076	4.13	4.0401	3.60607	2.8671	2.4651	3.7731	3.2321	3.08435	2.3485	1.9747	3.1942	2.7009	2.55457
1607	6	6	30.4	LE01Gene03818.t1	LE01Gene03818.t1	5		2.1406	2.1979	2.3489	2.43	2.27935	2.6826	1.9877	2.9474	2.1838	2.45038	2.8789	3.2031	3.1879	3.5499	3.20495
1610	6	6	16.4	LE01Gene12644.t1	LE01Gene12644.t1	3		0.6692	0.6929	0.5556	0.5775	0.6238	0.4857	0.471	0.4053	0.3937	0.438925	0.5782	0.4453	0.4831	0.377	0.4709
1612	6	6	64.1	LE01Gene10272.t2	LE01Gene10272.t2	3		1.8817	2.1141	1.8943	2.1123	2.0006	1.4022	1.3884	1.4093	1.3956	1.39887	1.2321	1.2503	1.2513	1.2548	1.24713
1618	6	6	14.9	LE01Gene06973.t2	LE01Gene06973.t2	13		4.4071	3.9827	4.402	4.0053	4.19928	3.2795	2.4149	3.3464	2.4901	2.88273	3.2551	3.6431	3.3303	3.6853	3.47845
1621	6	6	37.3	LE01Gene05853.t1	LE01Gene05853.t1	4		3.7106	3.7235	3.1663	3.201	3.45035	2.3827	2.3638	2.0346	2.0171	2.19955	2.5251	2.0033	2.1639	1.7162	2.10213
1668	5.51	5.61	25	LE01Gene05545.t3	LE01Gene05545.t3	6		1.9715	1.8653	2.23	2.1147	2.04537	1.5181	1.561	1.701	1.7732	1.63833	1.3892	1.1957	1.5714	1.363	1.37982
1676	5.46	5.6	17.9	LE01Gene08136.t1	LE01Gene08136.t1	3		2.3078	2.1716	1.987	1.8835	2.08747	2.5368	1.9722	2.1942	1.702	2.1013	2.0995	2.0612	1.8225	1.7856	1.9422
1697	5.19	5.33	17.3	LE01Gene04612.t1	LE01Gene04612.t1	4		2.5535	2.4073	2.2231	2.0574	2.31033	1.7856	1.6855	1.5403	1.4375	1.61223	1.7247	1.7717	1.4605	1.5295	1.6216
1730	4.97	5.12	43	LE01Gene11861.t1	LE01Gene11861.t1	15		5.3751	5.0335	15.0416	14.0185	9.86717	2.951	2.9816	6.9756	7.0336	4.98545	2.5098	1.6342	5.3281	3.6153	3.27185
1737	4.85	5.71	26.6	LE01Gene04813.t2	LE01Gene04813.t2	6		2.3013	2.1367	2.0071	1.8724	2.07938	2.177	2.0418	1.901	1.7836	1.97585	2.3258	2.479	2.035	2.1662	2.2515
1756	4.72	4.8	12.7	LE01Gene09597.t1	LE01Gene09597.t1	3		0.5724	0.6134	1.6569	1.7864	1.15727	1.1566	0.8012	3.3494	2.3214	1.90715	1.205	1.1462	3.5058	3.3265	2.29588
1765	4.63	4.7	12.2	LE01Gene06657.t2	LE01Gene06657.t2	3		0.5429	0.5048	0.4538	0.4263	0.48195	0.6781	0.7862	0.5724	0.662	0.674675	0.6576	0.2116	0.5579	0.1691	0.39905
1766	4.61	4.71	12.2	LE01Gene11286.t4	LE01Gene11286.t4	3		2.1619	1.5551	2.7824	2.0379	2.13433	1.8015	1.7453	2.2958	2.2333	2.01898	1.2289	1.5297	1.5918	1.8981	1.56212
1769	4.59	4.66	12.2	LE01Gene04633.t1	LE01Gene04633.t1	4		0.7612	0.7562	0.8073	0.8075	0.78305	0.5581	0.5148	0.591	0.5463	0.55255	0.4258	0.4412	0.4524	0.4672	0.44665
1780	4.5	5.16	25.5	LE01Gene02303.t2	LE01Gene02303.t2	5		2.0114	2.322	2.1859	2.5973	2.27915	1.8731	1.6562	2.0429	1.8129	1.84628	1.8301	1.607	2.0014	1.7686	1.80177
1786	4.45	4.59	18.6	LE01Gene04641.t1	LE01Gene04641.t1	3		2.8768	2.5925	2.4005	2.1472	2.50425	2.9225	2.8031	2.379	2.2659	2.59262	2.5841	2.1703	2.1271	1.7613	2.1607
1793	4.43	4.49	12.5	LE01Gene12252.t1	LE01Gene12252.t1	3		1.1341	0.8428	1.4466	1.083	1.12662	1.1191	1.4376	1.4411	1.8543	1.46303	1.6785	2.0211	2.1983	2.6196	2.12938
1845	4.16	4.49	51.5	LE01Gene00961.t1	LE01Gene00961.t1	5		2.3388	1.945	2.8903	2.4181	2.39805	1.5997	1.5422	1.9777	1.9077	1.75683	1.5802	1.2825	1.9627	1.589	1.6036
1857	4.12	4.21	11.4	LE01Gene02398.t1	LE01Gene02398.t1	3		2.7949	3.1003	0.5761	0.643	1.77858	3.9235	5.1859	0.8091	1.0701	2.74715	1.8576	4.5837	0.3849	0.9473	1.94338
1858	4.12	4.15	21	LE01Gene08614.t1	LE01Gene08614.t1	5		2.6548	2.5394	2.4712	2.3396	2.50125	3.4924	3.0499	3.1625	2.8062	3.12775	3.6057	3.0563	3.2581	2.7157	3.15895
1883	4.06	4.07	30.1	LE01Gene05216.t1	LE01Gene05216.t1	4		3.8162	6.7091	1.1605	2.0526	3.4346	5.0405	10.8073	1.5335	3.2898	5.16777	3.6254	4.9084	1.1081	1.4965	2.7846
1903	4.03	4.04	13.9	LE01Gene01684.t1	LE01Gene01684.t1	2		0.2896	0.5336	0.3032	0.5619	0.422075	0.6438	0.6033	0.6742	0.6321	0.63835	0.4164	0.3911	0.4381	0.4105	0.414025
1916	4.01	12.03	14.2	LE01Gene13992.t1	LE01Gene13992.t1	8		2.5524	2.5891	1.5645	1.6	2.0765	3.0391	2.8439	1.8744	1.7501	2.37688	3.7059	1.7774	2.2819	1.0919	2.21428
1917	4.01	6.21	11.5	LE01Gene05946.t1	LE01Gene05946.t1	3		2.4822	2.3473	2.1288	1.9082	2.21663	1.3192	1.6775	1.2252	1.5416	1.44087	1.7459	2.3598	1.5014	1.9849	1.898
1926	4.01	4.04	18.7	LE01Gene10340.t1	LE01Gene10340.t1	3		1.8723	1.6959	2.2199	2.0231	1.9528	1.2162	1.4592	1.4544	1.7416	1.46785	1.6806	1.9813	2.0124	2.3658	2.01003
1935	4.01	4.02	26.2	LE01Gene06413.t2	LE01Gene06413.t2	2		1.9661	1.1906	1.5924	0.968	1.42928	1.9086	1.9255	1.5463	1.5598	1.73505	3.048	2.4983	2.4909	2.0339	2.51778
1941	4.01	4.01	17.7	LE01Gene06152.t1	LE01Gene06152.t1	6		3.4408	3.6148	3.1035	3.2647	3.35595	2.0089	1.8419	1.8196	1.6793	1.83743	1.7747	2.3714	1.6168	2.1625	1.98135
1942	4	8.43	21.1	LE01Gene08980.t1	LE01Gene08980.t1	6		0.9772	0.9097	0.7868	0.7339	0.8519	0.8489	0.896	0.6812	0.7194	0.786375	0.5213	0.4816	0.4199	0.3824	0.4513
1943	4	8.05	27.6	LE01Gene04884.t2	LE01Gene04884.t2	4		2.5487	2.8193	3.0999	3.45	2.97947	1.4176	2.2909	1.725	2.7892	2.05567	1.499	0.0201	1.8325	0.0245	0.844025
1948	4	4.96	34.8	LE01Gene07204.t1	LE01Gene07204.t1	5		0.6754	0.6482	0.4897	0.4733	0.57165	0.4117	0.8058	0.2982	0.5875	0.5258	0.6231	0.4807	0.4545	0.3511	0.47735
1949	4	4.84	9.2	LE01Gene00944.t3	LE01Gene00944.t3	3		0.2929	0.3614	0.34	0.422	0.354075	0.3602	0.4722	0.4183	0.5487	0.44985	0.4176	0.2003	0.4872	0.2331	0.33455
1958	4	4.18	17.2	LE01Gene13368.t2	LE01Gene13368.t2	7		3.7817	4.1509	3.3452	3.6941	3.74297	3.8607	4.1626	3.4165	3.6858	3.7814	3.3974	4.2176	3.0206	3.7404	3.594
1963	4	4.09	9.8	LE01Gene08749.t1	LE01Gene08749.t1	3		0.6632	0.537	0.8053	0.656	0.665375	0.4821	0.5227	0.5857	0.6353	0.55645	0.374	0.5097	0.4564	0.6205	0.49015
1983	4	4.01	12.3	LE01Gene07085.t1	LE01Gene07085.t1	3		2.7169	1.9345	2.4211	1.7436	2.20403	1.3536	1.6843	1.1862	1.4877	1.42795	1.3393	1.5148	1.178	1.3268	1.33973
2002	4	4	9.9	LE01Gene06416.t1	LE01Gene06416.t1	3		6.7338	6.9235	7.1536	7.3755	7.0466	4.8812	4.1689	5.1703	4.4319	4.66308	4.7708	4.6361	5.091	4.9913	4.8723
2008	4	4	60.5	LE01Gene12503.t1	LE01Gene12503.t1	2		0.4911	0.4608	0.4634	0.4384	0.463425	0.6838	0.6608	0.6477	0.626	0.654575	0.6408	0.3451	0.6098	0.3332	0.482225
2010	4	4	11	LE01Gene10892.t2	LE01Gene10892.t2	3		2.081	2.0538	2.5753	2.5605	2.31765	1.6426	1.2901	2.0456	1.6064	1.64617	1.4618	1.6041	1.8246	2.0006	1.72277
2016	4	4	10.2	LE01Gene08330.t1	LE01Gene08330.t1	3		2.4092	2.5329	2.4043	2.5431	2.47237	1.3365	1.4455	1.3344	1.444	1.3901	3.0643	2.8806	3.0737	2.8822	2.9752
2021	4	4	29.7	LE01Gene13670.t1	LE01Gene13670.t1	3		3.2008	2.9176	3.2304	2.9635	3.07808	1.9687	1.8723	1.9691	1.893	1.92578	1.6018	1.4981	1.7547	1.5741	1.60717
2050	3.8	4.23	11.3	LE01Gene11039.t1	LE01Gene11039.t1	6		2.1082	2.2423	2.7076	2.8972	2.48882	2.0416	2.1787	2.6231	2.8009	2.41107	2.7493	2.518	3.5488	3.2422	3.01457
2053	3.79	4.11	18	LE01Gene09222.t1	LE01Gene09222.t1	3		1.9323	1.8823	2.416	2.3617	2.14807	1.6006	1.5375	1.9928	1.9032	1.75853	1.1998	1.3724	1.5017	1.7046	1.44463
2068	3.68	3.85	15	LE01Gene11311.t2	LE01Gene11311.t2	3		2.3529	1.2074	1.933	0.998	1.62282	1.5194	1.3312	1.2488	1.0947	1.29853	2.5111	2.6693	2.0735	2.1987	2.36315
2077	3.59	4.1	33.1	LE01Gene12447.t1	LE01Gene12447.t1	3		0.5978	0.5755	0.5765	0.5585	0.577075	0.5093	0.4513	0.4932	0.4354	0.4723	0.4996	0.5668	0.4847	0.5499	0.52525
2116	3.36	5.81	10.5	LE01Gene06455.t2	LE01Gene06455.t2	4		0.3805	0.3774	0.3436	0.3429	0.3611	0.7533	0.4123	0.6806	0.3727	0.554725	0.6538	0.4682	0.5935	0.4239	0.53485
2117	3.35	3.67	15.2	LE01Gene03561.t1	LE01Gene03561.t1	2		0.9855	2.1192	4.1039	8.8789	4.02187	1.5386	2.3406	6.4101	9.7571	5.0116	1.5279	1.8869	6.3955	7.8783	4.42215
2123	3.33	3.51	13	LE01Gene11399.t2	LE01Gene11399.t2	3		1.8104	2.5979	1.5028	2.1697	2.0202	0.085	0.853	0.0706	0.7088	0.42935	1.057	0.7327	0.8819	0.6098	0.82035
2138	3.21	4.81	23.6	LE01Gene10169.t1	LE01Gene10169.t1	4		2.2383	2.2204	2.6907	2.7031	2.46312	2.1014	1.9764	2.5984	2.4356	2.27795	1.9173	1.9123	2.3851	2.3664	2.14528
2146	3.18	3.37	16.6	LE01Gene10066.t2	LE01Gene10066.t2	3		0.5018	0.4665	0.6263	0.5857	0.545075	0.4458	0.3807	0.5566	0.4756	0.464675	0.6782	0.4083	0.8506	0.5108	0.611975
2170	2.98	3.2	24.9	LE01Gene01675.t1	LE01Gene01675.t1	2		0.6632	0.8588	1.1168	1.4549	1.02343	0.5612	0.847	0.9454	1.4277	0.945325	0.3573	0.1396	0.6047	0.2357	0.334325
2175	2.95	3.12	46.6	LE01Gene05221.t1	LE01Gene05221.t1	5		4.7952	3.6064	5.4901	4.1541	4.51145	2.0778	1.7979	2.3799	2.0605	2.07903	1.8481	1.8814	2.1267	2.1597	2.00397
2178	2.91	3.11	49.7	LE01Gene04217.t1	LE01Gene04217.t1	22		10.113	9.5952	9.3412	8.9168	9.49155	13.2547	10.0618	12.2486	9.3033	11.2171	30.5081	38.9638	28.3239	36.0837	33.4699
2184	2.84	3	8.1	LE01Gene02765.t1	LE01Gene02765.t1	2		0.3324	0.5445	0.3569	0.5772	0.45275	0.3339	0.4571	0.3556	0.485	0.4079	0.4105	0.3571	0.4368	0.381	0.39635
2222	2.51	2.58	20	LE01Gene04714.t1	LE01Gene04714.t1	2		0.4273	0.4356	0.5888	0.6029	0.51365	0.4776	0.3398	0.6553	0.4619	0.48365	0.4681	0.546	0.6421	0.7438	0.6
2232	2.45	2.52	16.7	LE01Gene00247.t1	LE01Gene00247.t1	4		4.4978	3.8537	3.4234	2.9509	3.68145	2.3082	2.8719	1.7576	2.1881	2.28145	3.6362	1.9502	2.7818	1.4882	2.4641
2237	2.39	2.94	7.2	LE01Gene07684.t2	LE01Gene07684.t2	4		0.7639	0.3718	0.5705	0.2794	0.4964	0.5923	1.418	0.4425	1.06	0.8782	0.4897	0.5572	0.3676	0.4172	0.457925
2245	2.37	2.43	8.1	LE01Gene07356.t1	LE01Gene07356.t1	2		2.3604	2.4639	1.7546	1.8552	2.10853	1.0435	1.3888	0.7703	1.0182	1.0552	1.8433	2.004	1.3791	1.4501	1.66912
2251	2.35	3.23	8.8	LE01Gene01096.t1	LE01Gene01096.t1	3		3.6488	3.7907	3.6369	3.7969	3.71833	4.4908	4.0019	4.4495	3.9894	4.2329	2.2356	2.5608	2.232	2.5568	2.3963
2257	2.34	2.4	11.2	LE01Gene00726.t1	LE01Gene00726.t1	4		2.4201	2.4491	2.79	2.8585	2.62942	2.3921	1.9706	2.7872	2.3	2.36247	2.1596	2.4835	2.5253	2.907	2.51885
2262	2.3	2.37	24.9	LE01Gene05588.t3	LE01Gene05588.t3	6		7.8454	7.5308	6.9878	6.7484	7.2781	4.8692	3.9752	4.3389	3.5443	4.1819	5.4691	4.5682	4.8962	4.0794	4.75323
2264	2.28	3.19	16.8	LE01Gene11861.t2	LE01Gene11861.t2	4		2.1409	2.0536	2.0467	1.9613	2.05062	2.3296	1.8819	2.2506	1.81	2.06803	1.5171	1.6105	1.4745	1.5487	1.5377
2311	2.11	2.14	19.6	LE01Gene04243.t1	LE01Gene04243.t1	2		1.1042	1.0233	1.2173	1.1358	1.12015	1.1207	1.6176	1.2357	1.7907	1.44117	2.3065	2.4553	2.5082	2.6693	2.48482
2326	2.08	2.11	33.3	LE01Gene02980.t1	LE01Gene02980.t1	11		4.1778	3.5711	4.3659	3.7546	3.96735	2.1627	2.0728	2.2611	2.1683	2.16622	2.4628	2.5923	2.5869	2.7161	2.58953
2328	2.08	2.1	25	LE01Gene00097.t2	LE01Gene00097.t2	2		4.1637	3.8987	1.5827	1.491	2.78402	3.2305	3.4423	1.2286	1.3099	2.30283	2.9806	4.9075	1.1388	1.8703	2.7243
2334	2.06	3.07	12.6	LE01Gene07769.t2	LE01Gene07769.t2	3		1.5492	1.5091	2.5746	2.5232	2.03903	1.1723	1.088	1.9491	1.81	1.50485	0.9177	1.0649	1.5328	1.7743	1.32242
2346	2.04	2.4	17.6	LE01Gene13124.t1	LE01Gene13124.t1	4		5.8023	8.1248	2.069	2.9148	4.72772	2.5986	4.0245	0.927	1.4365	2.24665	2.8077	1.9011	1.0063	0.6796	1.59867
2361	2.03	2.19	18.4	LE01Gene01478.t2	LE01Gene01478.t2	3		0.3528	0.9092	0.3502	0.9466	0.6397	0.4488	0.6275	0.4616	0.6033	0.5353	0.3754	0.4797	0.3924	0.4869	0.4336
2375	2.03	2.04	10.4	LE01Gene02688.t1	LE01Gene02688.t1	2		0.2388	0.2448	0.2202	0.2265	0.232575	0.231	0.3577	0.2154	0.3298	0.283475	0.2725	0.2086	0.2529	0.1921	0.231525
2399	2.01	15.77	69.2	LE01Gene05309.t1	LE01Gene05309.t1	40		2.0293	2.4289	1.9076	2.2971	2.16573	1.403	1.0214	1.3195	0.9611	1.17625	1.1147	0.5136	1.0532	0.484	0.791375
2426	2.01	2.03	7.1	LE01Gene07167.t1	LE01Gene07167.t1	2		1.694	1.7232	1.0688	1.0991	1.39628	3.643	2.8038	2.2907	1.7732	2.62767	3.7364	3.1998	2.3773	2.0382	2.83793
2446	2.01	2.01	7.6	LE01Gene11537.t1	LE01Gene11537.t1	2		1.8902	1.9276	2.5089	2.5662	2.22323	1.0132	1.3138	1.3378	1.7383	1.35078	1.1988	0.469	1.6025	0.6156	0.971475
2456	2.01	2.01	20.7	LE01Gene04546.t2	LE01Gene04546.t2	5		2.243	2.1416	2.1942	2.1077	2.17162	3.2434	2.6517	3.1742	2.5965	2.91645	2.1353	2.4442	2.0994	2.3972	2.26903
2473	2	4.01	18.8	LE01Gene07894.t1	LE01Gene07894.t1	2		1.2415	1.9226	1.5219	2.3712	1.7643	2.1587	2.04	2.6474	2.5034	2.33738	3.3043	2.9308	4.0714	3.6021	3.47715
2478	2	4	17.2	LE01Gene10166.t1	LE01Gene10166.t1	2		6.8942	5.6988	4.0534	3.3709	5.00432	4.2223	8.1286	2.4835	4.7839	4.90457	6.2619	7.9043	3.7004	4.6593	5.63148
2480	2	4	8	LE01Gene03405.t1	LE01Gene03405.t1	2		0.418	0.3771	0.2902	0.2634	0.337175	0.8027	0.7397	0.5575	0.514	0.653475	0.6476	1.0734	0.4518	0.7471	0.729975
2486	2	2.61	35.3	LE01Gene03955.t1	LE01Gene03955.t1	3		5.149	6.7494	3.4844	4.5951	4.99447	4.2376	3.335	2.8689	2.2591	3.17515	2.9243	2.9397	1.989	1.9945	2.46188
2489	2	2.47	7	LE01Gene08917.t1	LE01Gene08917.t1	3		4.5188	3.5289	3.462	2.72	3.55742	0.703	3.9014	0.5388	2.992	2.0338	1.3554	1.1133	1.0437	0.8552	1.0919
2495	2	2.13	6.3	LE01Gene08609.t2	LE01Gene08609.t2	2		2.8108	2.4285	3.7423	3.2531	3.05868	1.9203	1.547	2.5579	2.0618	2.02175	1.5582	1.6337	2.0852	2.1808	1.86448
2501	2	2.08	19.6	LE01Gene13555.t1	LE01Gene13555.t1	2		1.4873	1.1628	6.0568	4.7639	3.3677	0.9521	0.8367	3.8789	3.4109	2.26965	1.0283	0.7398	4.2088	3.0205	2.24935
2511	2	2.06	22	LE01Gene13910.t1	LE01Gene13910.t1	2		0.4483	0.4992	0.43	0.4817	0.4648	0.4563	0.5247	0.4378	0.5038	0.48065	0.4226	0.0335	0.4074	0.0322	0.223925
2521	2	2.04	18.7	LE01Gene00488.t1	LE01Gene00488.t1	3		3.0368	1.6887	1.9945	1.1159	1.95898	1.9601	2.1257	1.2879	1.3976	1.69282	0.01	1.1516	0.01	0.7583	0.482475
2540	2	2.02	12	LE01Gene12740.t2	LE01Gene12740.t2	2		3.3397	2.1993	2.9083	1.9269	2.59355	3.6005	2.7927	3.1368	2.4344	2.9911	3.9777	2.2439	3.4817	1.9592	2.91563
2547	2	2.02	19.2	LE01Gene12441.t1	LE01Gene12441.t1	3		3.4526	2.4238	2.3596	1.6666	2.47565	2.6773	4.0139	1.8305	2.746	2.81692	2.9703	4.044	2.0404	2.771	2.95643
2548	2	2.02	6.6	LE01Gene08402.t3	LE01Gene08402.t3	2		0.4046	0.6203	0.3271	0.5045	0.464125	0.3726	0.8006	0.3013	0.6479	0.5306	0.6035	0.7673	0.4904	0.622	0.6208
2577	2	2.01	27.1	LE01Gene11372.t1	LE01Gene11372.t1	2		0.8092	0.3735	0.5033	0.2249	0.477725	0.5395	0.6866	0.3197	0.4097	0.488875	0.7677	0.5408	0.4594	0.3221	0.5225
2582	2	2.01	7.2	LE01Gene04431.t1	LE01Gene04431.t1	2		0.3276	0.4095	0.255	0.3269	0.32975	0.4187	0.5192	0.3328	0.4101	0.4202	0.4858	0.5272	0.3923	0.4218	0.456775
2594	2	2.01	4.4	LE01Gene06974.t1	LE01Gene06974.t1	2		0.5401	0.5941	0.5674	0.6279	0.582375	0.5245	0.6942	0.5512	0.7299	0.62495	0.3481	0.6119	0.3675	0.6444	0.492975
2605	2	2.01	8.9	LE01Gene05195.t1	LE01Gene05195.t1	2		4.8338	4.6011	9.8831	9.4643	7.19557	1.0838	1.7488	2.2169	3.579	2.15713	2.1984	0.8412	4.5178	1.7243	2.32043
2608	2	2.01	6.1	LE01Gene00946.t1	LE01Gene00946.t1	2		1.2818	0.464	0.7004	0.2551	0.675325	2.9957	3.2589	1.6376	1.7825	2.41867	2.7304	1.551	1.4995	0.8497	1.65765
2627	2	2.01	12.2	LE01Gene10225.t1	LE01Gene10225.t1	3		2.0905	2.0819	2.0678	2.0719	2.07802	2.1447	2.0851	2.1224	2.0646	2.1042	2.5524	2.9135	2.5376	2.8894	2.72322
2628	2	2.01	17	LE01Gene06339.t1	LE01Gene06339.t1	3		0.3106	0.555	0.2999	0.5392	0.426175	0.6919	0.5384	0.6684	0.5203	0.60475	0.5551	0.497	0.5388	0.4811	0.518
2650	2	2	9.5	LE01Gene09525.t1	LE01Gene09525.t1	2		0.8336	1.0141	11.2715	13.7953	6.72862	1.1534	0.6522	15.6012	8.8277	6.55863	0.2986	0.4731	4.0586	6.4137	2.811
2663	2	2	9.2	LE01Gene05485.t3	LE01Gene05485.t3	2		1.0742	0.645	3.2224	1.9466	1.72205	0.6939	1.5585	2.0826	4.6802	2.2538	0.6083	0.5605	1.8341	1.6857	1.17215
2721	2	2	9.6	LE01Gene00313.t1	LE01Gene00313.t1	2		0.3434	0.5516	0.369	0.5965	0.465125	0.4341	0.6153	0.4668	0.662	0.54455	0.4968	0.343	0.5367	0.3696	0.436525
2795	2	2	14.1	LE01Gene05794.t1	LE01Gene05794.t1	2		3.6854	10.1667	0.9494	2.635	4.35913	3.588	5.0108	0.9247	1.2922	2.70392	4.7695	0.6072	1.235	0.1568	1.69212
2809	1.86	2.01	17.9	LE01Gene12417.t1	LE01Gene12417.t1	2		1.2765	1.2318	1.5969	1.5505	1.41392	1.476	1.2548	1.8473	1.5714	1.53737	1.7203	1.8847	2.1632	2.364	2.03305
2814	1.85	2.02	10.4	LE01Gene03829.t1	LE01Gene03829.t1	2		1.0391	2.0111	1.9127	3.7245	2.17185	1.37	1.1161	2.523	2.0566	1.76642	1.4195	1.4282	2.6263	2.6357	2.02743
2819	1.83	2.02	12.6	LE01Gene13397.t1	LE01Gene13397.t1	3		2.3166	2.3609	1.8966	1.9446	2.12968	2.0428	2.2051	1.6731	1.8071	1.93202	2.8112	3.2167	2.3133	2.6403	2.74538
2828	1.8	2	14.4	LE01Gene13515.t1	LE01Gene13515.t1	2		0.3565	0.5027	0.2952	0.4188	0.3933	0.7502	0.4138	0.6215	0.343	0.532125	0.3737	0.6416	0.311	0.5327	0.46475
2860	1.52	2.24	10.5	LE01Gene11586.t2	LE01Gene11586.t2	3		1.8482	1.9416	1.6721	1.7673	1.8073	1.3763	1.9962	1.2457	1.8078	1.6065	2.3909	2.6107	2.1742	2.3681	2.38598
2874	1.42	1.75	10.3	LE01Gene04390.t5	LE01Gene04390.t5	2		5.1151	1.5816	6.3349	1.9707	3.75058	1.7921	5.1752	2.2204	6.4159	3.9009	0.827	7.9585	1.0294	9.8821	4.92425
2880	1.41	1.8	10.4	LE01Gene04205.t1	LE01Gene04205.t1	2		0.8997	1.275	1.3765	1.9623	1.37838	1.5142	1.2479	2.3175	1.911	1.74765	1.523	1.9402	2.3418	2.9758	2.1952
